# 1 REDUCTION OF LAYER 5 MEDIATED LONG-RANGE CORTICAL COMMUNICATION BY 2 ANTIPSYCHOTIC DRUGS

3 Matthias Heindorf<sup>1</sup> & Georg B. Keller<sup>1,2,3</sup>

4 <sup>1</sup>*Friedrich Miescher Institute for Biomedical Research, Basel, Switzerland*

5 <sup>2</sup>*Faculty of Natural Sciences, University of Basel, Basel, Switzerland*

6 <sup>3</sup>*To whom correspondence should be addressed.*

7

8 **Psychosis is characterized by a diminished ability of the brain to distinguish externally driven**  
9 **activity patterns from self-generated activity patterns. Antipsychotic drugs are a class of small**  
10 **molecules with relatively broad binding affinity for a variety of neuromodulator receptors that, in**  
11 **humans, can prevent or ameliorate psychosis. How these drugs influence the function of cortical**  
12 **circuits and in particular their ability to identify self-generated activity patterns is still largely**  
13 **unclear. Here we used widefield calcium imaging to determine the cell type specific functional**  
14 **effects of antipsychotic drugs in mouse dorsal cortex during visuomotor integration. By comparing**  
15 **cell type specific activation patterns between locomotion onsets that were experimentally**  
16 **coupled to self-generated visual feedback and locomotion onsets that were not coupled, we show**  
17 **that deep cortical layers were differentially activated in these two conditions. We then show that**  
18 **the antipsychotic drug clozapine disrupted visuomotor integration at locomotion onsets also**  
19 **primarily in deep cortical layers. Given that one of the key components of visuomotor integration**  
20 **in cortex are long-range cortico-cortical connections, we tested whether the effect of clozapine**  
21 **was detectable in the correlation structure of activity patterns across dorsal cortex. We found that**  
22 **clozapine, as well as two other antipsychotic drugs, aripiprazole and haloperidol, resulted in a**  
23 **strong reduction in correlations of layer 5 activity between cortical areas and impaired the spread**  
24 **of visuomotor prediction errors generated in visual cortex. Our results are consistent with the**  
25 **interpretation that a major functional effect of antipsychotic drugs is an alteration of the**  
26 **activation of internal representations as a consequence of reduced long-range layer 5 mediated**  
27 **communication.**

28 *\*\*\* Dear reader, please note this manuscript is formatted in a standard submission format, and all*  
29 *statistical information is provided in Table S1. \*\*\**

## 30 INTRODUCTION

31 Under normal conditions, self-generated movements are coupled to sensory feedback in different  
32 modalities. Locomotion, for example, is coupled to proprioceptive feedback from muscle

33 movements, somatosensory and auditory feedback from touching the ground, vestibular feedback  
34 from translational acceleration, and visual feedback in the form of expanding visual flow. This  
35 coupling is key to our brain's ability to learn internal models of the world (Jordan and Rumelhart,  
36 1992). Internal models are the transformations between cortical areas and can be used to predict  
37 the sensory consequences of movement. Hallucinations and delusions can be explained as a  
38 misconfiguration of these internal models: assuming the predictions of the sensory consequences of  
39 movements are inaccurate this can result in self-generated activity that is not correctly distinguished  
40 from externally driven activity (Fletcher and Frith, 2009; Frith, 2005).

41 Self-generated movements result in broad activation of most regions of the brain (Musall et al.,  
42 2019; Stringer et al., 2019), including some primary sensory areas like visual cortex (Keller et al.,  
43 2012; Saleem et al., 2013) where they have been shown to depend on visual context (Pakan et al.,  
44 2016). The framework of predictive processing postulates that in cortex, these movement related  
45 signals are internal model based predictions of the sensory consequences of movement that are  
46 compared to externally generated bottom-up input to compute prediction errors (Jiang and Rao,  
47 2021; Keller and Mrsic-Flogel, 2018). Evidence for this interpretation has mainly come from the  
48 discovery of movement related prediction error responses in a variety of different cortical regions  
49 and species (Attinger et al., 2017; Audette et al., 2021; Ayaz et al., 2019; Eliades and Wang, 2008;  
50 Heindorf et al., 2018; Keller and Hahnloser, 2009; Keller et al., 2012; Stanley and Miall, 2007; Zmarz  
51 and Keller, 2016), and the observation that top-down inputs from motor areas of cortex appear to  
52 carry movement related predictions of sensory input to sensory areas of cortex (Audette et al., 2021;  
53 Leinweber et al., 2017). The neurons on which the opposing bottom-up input and top-down  
54 prediction converge are referred to as prediction error neurons and are thought to reside primarily  
55 in layer 2/3 of cortex (Jordan and Keller, 2020). To complete the circuit there then needs to be a  
56 population of neurons that integrate over prediction error responses. These are referred to as  
57 internal representation neurons. It is still unclear which cortical neuron type might function as  
58 internal representation neurons but based on anatomical arguments it is often speculated that they  
59 can be found in deep cortical layers (Bastos et al., 2012).

60 In humans, externally driven and self-generated activity patterns can be experimentally separated at  
61 least partially, for example, by showing subjects a visual stimulus and then later asking them to  
62 visualize the same stimulus (Le Bihan et al., 1993). This type of experiment is considerably more  
63 difficult to perform in animals. Using movement as a proxy for self-generated activity patterns,  
64 however, we can compare a condition in which self-generated and externally generated activity  
65 patterns are correlated to a condition in which they are not. In the visual system, we can use a

66 virtual reality environment to experimentally couple or decouple locomotion from visual flow  
67 feedback. We will refer to the former as a closed loop condition and to the latter as an open loop  
68 condition. Assuming the predictive processing model is correct, we should find differences in  
69 activation patterns in dorsal cortex in responses to locomotion onsets as a function of whether they  
70 occurred with or without coupled visual flow feedback. Both prediction error neurons as well as  
71 internal representation neurons should respond differentially. Thus, we set out to investigate  
72 whether there are differences between closed and open loop activation patterns of mouse dorsal  
73 cortex, and whether these differences are neuron type specific. Then, if hallucinations are indeed  
74 the result of aberrant activation of internal representations, possibly as a result of misconfigured  
75 internal models, antipsychotic drugs should alter differential activation patterns.

## 76 **RESULTS**

### 77 **Tlx3 positive layer 5 (L5) intratelencephalic (IT) neurons distinguished closed and open loop** 78 **visuomotor coupling**

79 To investigate neuron type specific differences in activity patterns at locomotion onsets with and  
80 without self-generated visual feedback in mouse dorsal cortex, we quantified locomotion onset  
81 activity using widefield calcium imaging (Wekselblatt et al., 2016). A GCaMP variant was expressed  
82 using either a retroorbital injection of an AAV-PHP.eB vector (Chan et al., 2017), or a cross between  
83 a Cre line and the Ai148 GCaMP6 reporter line (Daigle et al., 2018) (see Methods; **Figure 1A, Table**  
84 **S2**). Mice either expressed a GCaMP variant either brain wide (C57BL/6), or in genetically identified  
85 subsets of excitatory or inhibitory neurons using Cre driver lines. Please note, we use the term ‘brain  
86 wide’ here to describe an expression pattern that was determined by the combination of the AAV-  
87 PHP.eB tropism intersected with the expression pattern of EF1 $\alpha$  or hSyn1 promoters but that was  
88 otherwise brain wide (see Discussion). We used Emx1-Cre mice to target expression to cortical  
89 excitatory neurons (Gorski et al., 2002), Cux2-CreERT2 mice to target expression predominantly to  
90 layer 2/3 but also layer 4 excitatory neurons (Franco et al., 2012), Scnn1a-Cre mice to target  
91 expression to a subset of layer 4 excitatory neurons (Madisen et al., 2010), Tlx3-Cre mice to target  
92 expression to a subset of layer 5 IT neurons (Gerfen et al., 2013), and Ntsr1-Cre mice to target  
93 expression to a subset of layer 6 excitatory neurons (Gong et al., 2007). To target subpopulations of  
94 inhibitory neurons, we used PV-Cre (Hippenmeyer et al., 2005), VIP-Cre (Taniguchi et al., 2011), and  
95 SST-Cre mice (Taniguchi et al., 2011) (see Methods). Prior to the start of the imaging experiments,  
96 mice were implanted with a crystal skull cranial window (Kim et al., 2016). We used crystal skull  
97 preparations as we found that hemodynamic artifacts were smaller in this preparation compared to  
98 those observed in clear skull preparations (**Figure S1**). For all experiments, mice were head fixed and

99 free to locomote on a spherical treadmill (**Figure 1B**). Activity from dorsal cortex was imaged while  
100 mice were in a closed loop visuomotor condition, in which locomotion on the spherical treadmill  
101 controlled forward movement in a virtual corridor. Following this, mice were exposed to an open  
102 loop condition during which mice were presented with a replay of the visual flow they had self-  
103 generated in the preceding closed loop condition.

104 We first compared locomotion onset responses in the closed loop condition to those in the open  
105 loop condition in mice that expressed GCaMP brain wide (C57BL/6). Consistent with previous  
106 findings (Musall et al., 2019; Stringer et al., 2019), we found that locomotion onset resulted in broad  
107 activation across most of dorsal cortex in both the closed and open loop conditions (**Figure 1C**).  
108 However, comparing the same locomotion onsets in mice that expressed GCaMP6 only in Tlx3  
109 positive L5 IT neurons, we found that the activation pattern at locomotion onset was strikingly  
110 different between closed and open loop conditions (**Figure 1D**). While locomotion onset in the open  
111 loop condition resulted in an increase in activity across dorsal cortex similar to that observed in the  
112 C57BL/6 mice with brain wide GCaMP expression, locomotion onset in the closed loop condition  
113 resulted in a very different activation pattern: In posterior parts of dorsal cortex, activity decreased,  
114 while in frontal parts of the dorsal cortex, activity increased. To quantify these activation patterns  
115 across mice, we selected six regions of interest: primary visual cortex (V1), antero-medial secondary  
116 visual cortex (V2am), retrosplenial cortex (RSC), primary motor cortex (M1), the anterior cingulate  
117 cortex at the level of bregma (A24b), and secondary motor cortex (M2) (**Figure 1E**). In C57BL/6 mice  
118 that expressed GCaMP brain wide, closed loop locomotion onset resulted in similar activity patterns  
119 across these six regions (**Figure 1F**). This activity pattern was not markedly different from that  
120 observed during locomotion onsets in an open loop condition (**Figure 1G**). To quantify the  
121 contribution of visual flow onset to the closed loop locomotion onset activity, we measured  
122 responses to visual flow onsets that occurred in the absence of locomotion in the open loop  
123 condition (**Figure 1H**). In C57BL/6 mice with brain wide GCaMP expression, visual flow onsets  
124 resulted in responses that were small compared to those observed during locomotion onset, even in  
125 V1. Note that a visual flow onset is a relatively weak visual stimulus compared to a drifting grating  
126 stimulus. A grating stimulus is typically composed of a gray screen or a standing grating stimulus that  
127 suddenly transitions to a drifting grating, and thus the visual flow undergoes a very high  
128 acceleration. A visual flow onset in an open loop condition is the replay of previously self-generated  
129 visual flow and thus exhibits much lower visual flow acceleration. The absence of a strong visual flow  
130 onset response in C57BL/6 mice that expressed GCaMP brain wide is consistent with a high similarity  
131 of closed and open loop locomotion onset responses.

132 In mice that expressed GCaMP6 in Tlx3 positive L5 IT neurons, the closed loop locomotion onset  
133 patterns differed markedly when compared across the six regions of interest (**Figure 1I**). Moreover,  
134 these activation patterns were different from those observed during open loop locomotion onsets  
135 (**Figure 1J**). In Tlx3 positive L5 IT neurons, open loop visual flow onsets that occurred in the absence  
136 of locomotion resulted in quantifiable responses in V1 and V2am (**Figure 1K**), but the closed loop  
137 locomotion onset responses could not be explained by the sum of locomotion and visual flow onset  
138 responses (**Figure S2**). We repeated these experiments and analyses for the other excitatory and  
139 inhibitory cortical neuron types (**Figure S3**). For each neuron type, we quantified the similarity of the  
140 activity patterns associated with closed and open loop locomotion onsets by calculating the  
141 correlation coefficient between the activity traces in a window around locomotion onset (-5 s to +3  
142 s) and averaging across regions of interest (see Methods). We found the highest similarity between  
143 closed and open loop locomotion onsets in C57BL/6 mice that expressed GCaMP brain wide and in  
144 mice that expressed GCaMP6 in PV positive interneurons, and the similarity was lowest in mice that  
145 expressed GCaMP6 in Tlx3 positive L5 IT and Ntsr1 positive layer 6 excitatory neurons (**Figures 1L**).  
146 Thus, excitatory neurons of deep cortical layers exhibited the strongest differences between closed  
147 and open loop locomotion related activation. The remarkable aspect of these findings is not that  
148 there are differences between closed and open loop locomotion onsets, particularly in visual regions  
149 of cortex one would perhaps expect to find differences, but that these differences are larger  
150 specifically in the deep cortical layers.

151 To quantify how the interaction between locomotion and visual flow feedback changes across dorsal  
152 cortex, we computed correlations between calcium activity and locomotion speed for each region of  
153 interest, for closed and open loop conditions separately. In C57BL/6 mice that expressed GCaMP  
154 brain wide, this correlation was comparable between closed and open loop conditions, was highest  
155 in posterior regions of dorsal cortex, and lower in more anterior regions (**Figures 2A and 2B**). In mice  
156 that expressed GcaMP6 in Tlx3 positive L5 IT neurons, the correlation between locomotion speed  
157 and calcium activity in the closed loop session was negative in posterior regions of dorsal cortex and  
158 positive in anterior regions. Conversely, in open loop conditions, the correlation was positive  
159 throughout dorsal cortex (**Figures 2C and 2D**). To test whether it was the coupling of visual flow that  
160 resulted in a reduction of the correlation in the closed loop condition or whether the presence of an  
161 uncoupled visual stimulus resulted in an increase of correlation, we also compared these  
162 correlations to those observed when mice were locomoting in relative darkness (see Methods). In  
163 C57BL/6 mice that expressed GCaMP brain wide the correlation of calcium activity with locomotion  
164 in darkness was indistinguishable from that in closed or open loop (**Figure 2B**). In mice that

165 expressed GCaMP6 in Tlx3 positive L5 IT neurons, an interesting pattern emerged. In visual regions  
166 of dorsal cortex, the correlation between locomotion speed and calcium activity in relative darkness  
167 resembled that observed in open loop conditions, while in frontal regions, it resembled that  
168 observed in closed loop conditions. In visual regions, the coupling of visual flow resulted in a  
169 reduction of correlation, while in frontal regions the presence of an uncoupled visual stimulus  
170 resulted in an increase of correlations. Thus, the difference between closed and open loop  
171 conditions likely had different origins in visual and frontal regions of dorsal cortex. Overall, we  
172 concluded that the coupling of locomotion and resulting visual flow feedback not only activated Tlx3  
173 positive L5 IT neurons differentially but did so throughout dorsal cortex, well beyond visual regions.

174 **Visuomotor prediction errors originated in visual cortical regions and had opposing effects on Tlx3**  
175 **positive L5 IT activity**

176 A consequence of the natural coupling of locomotion and visual flow feedback is that movements  
177 are a good predictor of self-generated sensory feedback. In our closed loop experiments, forward  
178 locomotion was a strong predictor of backward visual flow. It has been speculated that such  
179 predictions are used to compute prediction errors in layer 2/3 (L2/3) of cortex (Jordan and Keller,  
180 2020). Prediction errors come in two variants: Positive prediction errors that signal more visual flow  
181 than predicted and negative prediction errors that signal less visual flow than predicted (Keller and  
182 Mrsic-Flogel, 2018; Rao and Ballard, 1999). To probe for negative and positive prediction error  
183 signals, we quantified the responses to visuomotor mismatch events and to visual stimuli  
184 (representing less and more visual flow input than expected, respectively). Visuomotor mismatch  
185 was introduced by briefly (1 s) halting visual flow during self-generated feedback in the closed loop  
186 condition. Visual responses were elicited by presenting drifting grating stimuli to a passively  
187 observing mouse (see Methods). Please note, both types of prediction errors can be probed using a  
188 variety of stimuli, but the two we are using here, in our experience, are the most robust at eliciting  
189 strong responses in V1. In C57BL/6 mice that expressed GCaMP brain wide, both visuomotor  
190 mismatch and grating stimuli resulted in increases of activity that were strongest and appeared first  
191 in visual regions of dorsal cortex (**Figures 3A-3C**). In mice that expressed GCaMP6 in Tlx3 positive  
192 layer 5 IT neurons, visuomotor mismatch resulted in an increase of activity in V1, while grating onset  
193 resulted in a decrease of activity in V1 (**Figures 3D-3F**). Thus, in dorsal cortex, both mismatch and  
194 drifting grating stimuli primarily activated visual cortex but resulted in opposing activation patterns  
195 in Tlx3 positive L5 IT neurons. An increase in activity to negative prediction errors and a decrease to  
196 positive prediction errors would be consistent with either a population of negative prediction error  
197 neurons or a type of internal representation neuron (Rao and Ballard, 1999). Given that L5 neurons

198 in V1 do not exhibit the opposing influence of top-down and bottom-up input necessary to compute  
199 prediction errors (Jordan and Keller, 2020), we speculated that Tlx3 positive L5 IT neurons might  
200 function as a type of internal representation neuron.

### 201 **The antipsychotic drug clozapine alters visuomotor integration in L5**

202 The activation of an internal representation is the brain's best guess at what the stimuli in the  
203 environment are. We speculated that the activation of such an internal representation would be  
204 particularly susceptible to substances that are known to reduce illusory percepts, like antipsychotic  
205 drugs. We thus quantified the changes in dorsal cortex activity associated with a single  
206 intraperitoneal injection of an antipsychotic drug (clozapine). In C57BL/6 mice that expressed  
207 GCaMP brain wide, we found that closed and open loop locomotion onsets were almost unaffected  
208 by clozapine (**Figures 4A and 4B**), while there was a small increase in open loop visual flow onset  
209 responses (**Figure 4C**). In mice that expressed GCaMP6 in Tlx3 positive L5 IT neurons, however,  
210 clozapine fundamentally changed both closed and open loop locomotion onset responses. In V1,  
211 both types of locomotion onset now resulted in a massive increase in activity (**Figures 4D and 4E**).  
212 Conversely, open loop visual flow onset responses remained largely unchanged (**Figure 4F**).  
213 Clozapine also had an opposing effect on the average correlation of activity with locomotion in Tlx3  
214 positive L5 IT neurons. While the average correlation between activity and locomotion was increased  
215 in C57BL/6 mice that expressed GCaMP brain wide, the same measure was decreased in mice that  
216 expressed GCaMP6 in Tlx3 positive L5 IT neurons (**Figure S4**). Thus, consistent with the speculation  
217 that Tlx3 positive L5 neurons might function as internal representation neurons, clozapine exhibited  
218 a substantially stronger influence on locomotion onset responses in Tlx3 positive L5 IT neurons than  
219 would be expected from the effect of clozapine on brain wide responses.

### 220 **Antipsychotic drugs decouple long-range cortico-cortical activity**

221 L5 IT neurons are the primary source of long-range cortical communication and are one prominent  
222 source of locomotion related activity in V1 (Leinweber et al., 2017). Given that clozapine increased  
223 locomotion onset responses in L5 IT neurons in V1, we wondered whether clozapine might more  
224 generally change the long-range influence between L5 IT neurons. To investigate this possibility, we  
225 computed the correlations of calcium activity between the six regions of interest across both  
226 hemispheres and all recording conditions. We did this first in C57BL/6 mice that expressed GCaMP  
227 brain wide before (**Figure 5A**) and after a single intraperitoneal injection of clozapine (**Figure 5B**).  
228 Overall, clozapine resulted in a relatively modest decrease in correlations. On repeating this  
229 experiment in mice that expressed GCaMP6 in Tlx3 positive L5 IT neurons, we found a larger



230 decrease in correlations that appeared to be stronger for regions that were further apart (**Figures 5C**  
231 **and 5D**). To quantify these changes, we plotted the correlations as a function of linear distance  
232 between the regions as measured in a top-down view of dorsal cortex (**Figure S5A**). Note, this is of  
233 course only an approximation of the actual axonal path length between the regions. To visualize the  
234 distribution of correlations, we interpolated the data and represented them as heatmaps (**Figure**  
235 **S5B**). The resulting representation for the data from C57BL/6 mice that expressed GCaMP brain wide  
236 before and after clozapine injection is shown in **Figures 6A** and **6B**, respectively. We then split the  
237 data into approximately equal portions of short- and long-range correlations using a cutoff of 0.9  
238 times the bregma-lambda distance (approx. 3.8 mm). While both short- and long-range correlations  
239 were reduced, this reduction was not significant in either case (**Figure 6C**). We also found no  
240 evidence of a difference between short- and long-range correlation changes. In mice that expressed  
241 GCaMP6 in Tlx3 positive layer 5 IT neurons, however, we found a significant reduction in both short-  
242 and long-range correlations (**Figures 6D and 6E**), and both were reduced stronger than in C57BL/6  
243 mice that expressed GCaMP brain wide (C57BL/6 vs Tlx3-Cre x Ai148, short-range:  $p < 0.05$ ; long-  
244 range:  $p < 10^{-5}$ ; rank-sum test). Moreover, the reduction in activity correlations was stronger for  
245 long-range correlations than it was for short-range correlations (**Figure 6F**). To confirm that the  
246 clozapine induced reduction in correlation was stronger in deep cortical layers, we repeated the  
247 experiment in a population of L2/3 and L4 excitatory neurons using Cux2-CreERT2 x Ai148 mice.  
248 Consistent with the hypothesis that the strongest effect of clozapine was observed in L5 IT neurons,  
249 we found that clozapine decreased correlations of cortical activity in superficial excitatory neurons  
250 (**Figure S6**). However, this reduction was significantly weaker than the reduction we observed in  
251 mice that expressed GCaMP6 in Tlx3 positive layer 5 IT neurons (Cux2-CreERT2 x Ai148 vs Tlx3-Cre x  
252 Ai148, short-range:  $p < 0.005$ , long-range:  $p < 10^{-8}$ , rank-sum test). Thus, administration of the  
253 antipsychotic drug clozapine resulted in a decorrelation of activity across dorsal cortex that was  
254 stronger in L5 IT neurons (Tlx3) than it was in either L2/3 excitatory neurons (Cux2) or in the brain  
255 wide average (C57BL/6).

256 To test whether the decorrelation of the activity of L5 IT neurons is specific to clozapine or might  
257 more generally be a functional signature of antipsychotic drugs, we repeated the experiments with  
258 two additional antipsychotic drugs, aripiprazole and haloperidol. We found that the principal effect  
259 of decorrelation of the activity patterns of Tlx3 positive L5 IT neurons was preserved with both drugs  
260 (**Figures 7A-7F**). These changes in correlation were absent upon injection of a psychostimulant  
261 (amphetamine; **Figures 7G-7I**). Thus, it is possible that antipsychotic drugs in general might function  
262 by reducing the strength of long-range interactions between cortical L5 IT neurons.



263 Changes in the correlation between cortical regions could either be driven by changes in common  
264 external inputs or through changes in communication between them. If antipsychotic drugs primarily  
265 reduce correlations by reducing the strength of communication between cortical regions, we would  
266 expect to find changes in the way responses spread between cortical regions. We used visuomotor  
267 prediction error responses that originated in V1 (**Figure 3**) to quantify how the spread of these  
268 responses in Tlx3 positive layer 5 IT neurons was influenced by antipsychotic drugs. The computation  
269 of negative prediction errors during movement requires a prediction of visual flow, which is  
270 mediated by long-range cortical input from L5 neurons in regions like A24b (Leinweber et al., 2017),  
271 as well as a bottom-up visual signal. By contrast, the computation of a positive prediction error  
272 during passive observation requires, in principle, only a bottom-up visual signal (assuming a  
273 prediction of no-change is signaled as an absence of activity in top-down input). Thus, we would  
274 primarily expect to find a reduction in mismatch responses in layer 5 IT neurons and a reduction in  
275 the spread of this signal to secondary visual regions. This is indeed what we observed: Mismatch  
276 responses were partially reduced in V1 and almost absent in V2am after injection of antipsychotic  
277 drugs (**Figure 8A**). And while responses to onsets of drifting gratings were also reduced in V2am,  
278 they were overall less affected by the antipsychotic drugs than mismatch responses (**Figure 8B**). Why  
279 there would be a differential effect on the propagation of positive and negative prediction error  
280 responses from V1 to V2am is unclear. Nevertheless, these results are consistent with the  
281 interpretation that antipsychotic drugs reduce lateral communication in L5.

## 282 **DISCUSSION**

283 When interpreting our results, it should be kept in mind that the source of the widefield imaging  
284 signal in these experiments is not entirely clear and is likely a combination of somatic, dendritic, and  
285 axonal signals. Given that the signal attenuation half depth in cortex is on the order of 100  $\mu\text{m}$   
286 (Aravanis et al., 2007), most signals likely come from the superficial 100  $\mu\text{m}$  of tissue (Allen et al.,  
287 2017). In the case of the Tlx3 recordings, this would mean that we were recording a mixture of  
288 axonal and dendritic signals of the Tlx3 neurons that have their soma in L5 but have a dense net of  
289 axons and dendrites in L1. In the case of the brain wide expression of GCaMP using an AAV-PHP.eB  
290 in C57BL/6 mice, the signals we recorded likely also include contributions from thalamic axons. In  
291 addition to this, there is a hemodynamic contribution to the signal (Allen et al., 2017; Ma et al.,  
292 2016; Valley et al., 2020) that is the result of varying occlusion by blood vessels. We attempted to  
293 correct for the hemodynamic response using a 405 nm wavelength isosbestic illumination of  
294 GCaMP6, but we have found that we cannot recover the hemodynamic responses measured in GFP  
295 experiments. Accurate correction likely requires calibration on GFP measurements (Valley et al.,

296 2020). Given that hemodynamic responses should not systematically differ between different mouse  
297 lines, and that in the crystal skull preparation the contribution of hemodynamic occlusion to  
298 increases in fluorescence were relatively small (**Figure S1**), these hemodynamic artefacts should not  
299 substantially alter our conclusions. Lastly, it should be kept in mind that responses in these widefield  
300 recordings inherently reflect population averages. Assuming there is some form of lateral inhibition  
301 among neurons, population averages need not reflect responses of neurons that are tuned to the  
302 specific stimulus presented. For example, the suppression to grating stimuli we observed in V1 Tlx3  
303 positive L5 IT neurons could be the result of a subset of Tlx3 neurons that are strongly responsive to  
304 the specific grating presented suppressing the rest of the population of Tlx3 neurons. The sum of  
305 both could then result in a net decrease in calcium activity. Thus, an understanding of the  
306 mechanism that results in opposing population responses of Tlx3 positive L5 IT neurons to positive  
307 and negative prediction errors will require measurements with single neuron resolution.

308 In our experiments we have focused on Tlx3 positive L5 IT neurons, but given that L5 IT neurons are  
309 densely connected to L5 pyramidal tract neurons (Anderson et al., 2010; Kiritani et al., 2012) and to  
310 L6 neurons (Xu et al., 2016; Yamawaki and Shepherd, 2015), it is not unlikely that these neuron types  
311 would follow similar patterns of activity and exhibit similar susceptibility to the influence of  
312 antipsychotic drugs. In the comparison of closed and open loop locomotion onsets, we do indeed  
313 find that Ntsr1 positive L6 excitatory neurons exhibit similar levels of dissimilarity as those observed  
314 in Tlx3 positive L5 IT neurons (**Figure 1L**). It is possible that responses in the Ntsr1 recordings,  
315 however, were noisier than those in the Tlx3 recordings (**Figure S3**), likely because of the lower  
316 dendritic and axonal volume of Ntsr1 positive neurons in L1. Thus, while we have focused on the  
317 Tlx3 positive L5 IT neurons mainly for reasons of experimental convenience, it is possible that both  
318 the differential activation in closed and open loop locomotion onsets as well as the susceptibility of  
319 long-range correlations to antipsychotic drugs is a general feature of cortical layers 5 and 6.

320 It is still unclear what the relevant sites of action in the brain are of antipsychotic drugs.

321 Antipsychotic drugs are often antagonists of the D2 receptors, which are most strongly expressed in  
322 striatum. Consequently, it is sometimes assumed that the relevant site of action of antipsychotics is  
323 the striatum. Consistent with this, an increase in striatal dopamine activates auditory cortex (Maia  
324 and Frank, 2017) and mediates hallucination-like perceptions in mice (Schmack et al., 2021). It is  
325 intriguing, however, to speculate that the effects we observed in L5 IT neurons, which provide a  
326 dominant input to striatum (Morita et al., 2019), may be an alternate site of action. Feedback from  
327 striatum to cortex is exclusively mediated through thalamus, and neither L4, the primary thalamo-  
328 recipient layer in cortex, nor our brain wide recordings exhibited any of the effects we saw in L5 IT

329 neurons. Thus, the effects we saw in L5 IT neurons are either not inherited from striatum or are  
330 mediated by a separate set of thalamic neurons via direct thalamic input to deep cortical layers  
331 (Constantinople and Bruno, 2013; Douglas and Martin, 1991). Thalamocortical collaterals in deep  
332 layers, however, come from thalamic neurons that project primarily to superficial layers  
333 (Oberlaender et al., 2012). Thus, we think it is unlikely that the observed effects in L5 IT neurons  
334 were inherited from striatum. Independent of whether the treatment-relevant site of action of  
335 antipsychotic drugs is indeed in L5 IT neurons, the long-range decorrelation of activity we observed  
336 after antipsychotic drug injection could be used as a basis for a functional screen for compounds  
337 with antipsychotic efficacy. Given that in the brain wide recordings the decorrelation of activity was  
338 weaker compared to that observed in Tlx3 positive L5 IT neurons, it might be possible to test for  
339 similar effects in human subjects using layer specific fMRI recordings (Haarsma et al., 2020).

340 A rather surprising implication of our results is that the dominant mode of coupling in cortex might  
341 be lateral, not vertical. Both the observation that the difference between closed and open loop  
342 locomotion onsets were detectable predominantly in L5 and that the antipsychotic drug induced  
343 decorrelation of dorsal cortex activity was predominantly evident in L5, suggest that the lateral  
344 coupling within L5 across dorsal cortex is stronger than the vertical coupling between superficial  
345 layers and L5.

346 One of the diseases treated with antipsychotic drugs is schizophrenia. It has been speculated that  
347 disrupted resting-state functional connectivity in brain networks involving cortex is central to the  
348 pathogenesis of schizophrenia (Li et al., 2017; Northoff and Duncan, 2016). Schizophrenic patients  
349 exhibit increases in resting state functional connectivity between a subset of cortical regions (Li et  
350 al., 2019). Auditory hallucinations, one of the hallmark symptoms of schizophrenia, are associated  
351 with increased activation of diverse cortical regions (Catafau et al., 1994; Dierks et al., 1999; Shergill  
352 et al., 2000). Thus, it is conceivable that antipsychotic drugs counteract this by reducing the strength  
353 of long-range cortical connectivity mediated by layer 5 IT neurons, independent of whether the  
354 increased activity in schizophrenic patients is indeed driven by aberrant increases in the strength of  
355 long-range cortical connections or is a consequence of an aberrant increase in the strength of  
356 striato-thalamo-cortical loops. However, a direct involvement of cortical circuits in the pathogenesis  
357 of schizophrenia is consistent with the glutamate hypothesis of schizophrenia. It is based on the  
358 finding that NMDA receptor antagonists induce schizophrenia-like symptoms (Moghaddam and  
359 Javitt, 2012), and that disturbances of NMDA and AMPA receptor related gene expression are  
360 associated with schizophrenia (Harrison and Weinberger, 2005; Singh et al., 2020). In V1, it has been  
361 shown that NMDA receptors are necessary during visual development to establish normal prediction

362 error signaling (Widmer and Keller, 2021). Thus, it is conceivable that a disruption of glutamatergic  
363 signaling in cortex that alters the way internal representations are activated by prediction errors is  
364 central to the etiology of schizophrenia. If so, we should find impairments in all domains of cortical  
365 function, including sensory processing. In the case of the sensory cortex, cortical dysfunctions should  
366 be apparent earlier in development, concurrent with the critical period for plasticity in sensory areas  
367 of cortex. While the core symptoms of schizophrenia typically appear in late adolescence, sensory  
368 processing is indeed impaired in schizophrenic patients (Javitt, 2009) and is apparent, for example, in  
369 the reduction of surround suppression in V1 (Yoon et al., 2009). Interestingly, some of these  
370 disturbances are detectable already during childhood as visuo-perceptual and reading anomalies in  
371 some subjects that later develop schizophrenia (Parellada et al., 2017). Positive symptoms of  
372 schizophrenia can be explained in a predictive processing framework of cortical function as a  
373 disturbance of a prediction error based update of internal representations (Fletcher and Frith, 2009;  
374 Frith, 2005). There are two types of prediction error neurons, positive and negative, and, given that  
375 cortex likely implements a non-hierarchical variant of predictive processing (Garner and Keller,  
376 2022), two types of internal representation neurons. One set of internal representation neurons is  
377 excited by positive prediction errors and inhibited by negative prediction errors, and the other one is  
378 inhibited by positive prediction errors and excited by negative prediction errors (Keller and Mrsic-  
379 Flogel, 2018). Tlx3 positive L5 IT neurons exhibited opposing responses to positive and negative  
380 prediction errors (**Figure 3**), consistent with the responses of internal representation neurons. Given  
381 that the effects of antipsychotic drugs are predominantly observed in L5 IT neurons and that  
382 anesthesia is thought to decouple L5 neuron somata from their apical tuft and thereby prevents  
383 conscious perception (Suzuki and Larkum, 2020), we speculate that Tlx3 positive L5 IT neurons may  
384 be one type of internal representation neuron and one of the functionally relevant sites of  
385 antipsychotic action. Finally, it is possible that an aberrant pattern of functional connectivity among  
386 layer 5 cortical neurons is central to the pathogenesis of schizophrenia.

387

388 **FIGURES**

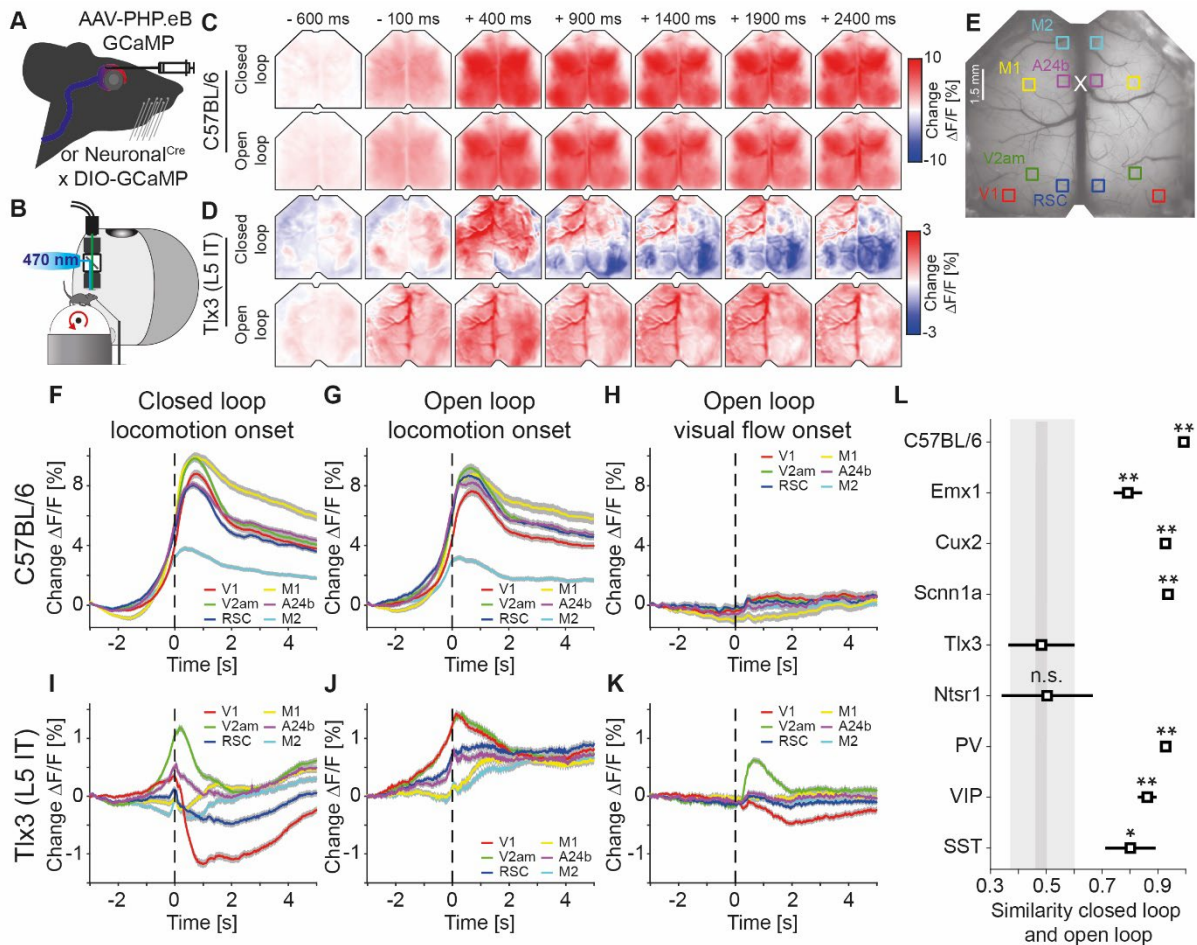

390 **Figure 1. Activation patterns of deep cortical layers distinguished closed and open loop locomotion**  
391 **onsets throughout dorsal cortex.**

392 **(A)** Schematic of GCaMP expression strategy. We either injected an AAV-PHP.eB virus retroorbitally  
393 to express GCaMP brain wide (C57BL/6), in cortical excitatory neurons (Emx1-Cre) or in a subset of  
394 SST positive interneurons (see Methods and **Table S2**) or used the progeny of a cell type  
395 specific Cre driver line (Neuronal<sup>Cre</sup>: Cux2-CreERT2, Scnn1a-Cre, Tlx3-Cre, Ntsr1-Cre, PV-Cre, VIP-Cre  
396 or SST-Cre) with the Ai148 GCaMP6 reporter line. All mice were then implanted with a crystal skull  
397 cranial window prior to imaging experiments.

398 **(B)** Schematic of the experimental setup. We imaged GCaMP fluorescence under 470 nm LED  
399 illumination with an sCMOS camera through a microscope. Mice were free to locomote on an air  
400 supported spherical treadmill while coupled (closed loop), uncoupled (open loop), or no (dark) visual  
401 flow in the form of movement along a virtual corridor was displayed on a toroidal screen placed in  
402 front of the mouse. Walls of the virtual corridor were patterned with vertical sinusoidal gratings. In a  
403 separate condition, we then presented drifting grating stimuli (grating session, see Methods).

404 (C) Average response in an example C57BL/6 mouse that expressed GCaMP6 brain wide during  
405 closed loop locomotion onsets (top row, 83 onsets) and open loop locomotion onsets (bottom row,  
406 153 onsets). Locomotion onsets in both conditions activated dorsal cortex similarly.

407 (D) As in C, but in an example Tlx3-Cre x Ai148 mouse that expressed GCaMP6 in L5 IT neurons  
408 during closed loop locomotion onsets (top row, 88 onsets) and open loop locomotion onsets  
409 (bottom row, 83 onsets). Note that activity decreased in posterior regions of dorsal cortex during  
410 closed loop locomotion onsets.

411 (E) Example crystal skull craniotomy marking the 6 regions of interest in each hemisphere we  
412 selected: primary visual cortex (V1, red), retrosplenial cortex (RSC, blue), antero-medial secondary  
413 visual cortex (V2am, green), primary motor cortex (M1, yellow), anterior cingulate cortex (A24b,  
414 purple), and secondary motor cortex (M2, cyan). The white cross marks bregma.

415 (F) Average response during closed loop locomotion onsets in C57BL/6 mice that expressed GCaMP  
416 brain wide in the 6 regions of interest (907 onsets in 6 mice, activity was averaged across  
417 corresponding regions in both hemispheres). Shading indicates SEM over onsets.

418 (G) As in F, but for open loop locomotion onsets (598 onsets in 6 mice).

419 (H) As in F, but for visual flow onsets in the open loop condition restricted to times when the mice  
420 were not locomoting (416 onsets in 6 mice).

421 (I) Average response during closed loop locomotion onsets in Tlx3-Cre x Ai148 mice that expressed  
422 GCaMP6 in L5 IT neurons (1919 onsets in 15 mice, activity was averaged across corresponding  
423 regions in both hemispheres). Shading indicates SEM over onsets.

424 (J) As in I, but for open loop locomotion onsets (1125 onsets in 15 mice).

425 (K) As in J, but for visual flow onsets during open loop sessions restricted to times when the mice  
426 were not locomoting (1189 onsets in 15 mice).

427 (L) Similarity of the average closed loop and open loop locomotion onset responses quantified as the  
428 correlation coefficient between the two in a window -5 s to +3 s around locomotion onset (see  
429 Methods). Error bars indicate SEM over the 12 (6 per hemisphere) cortical regions. Statistical  
430 comparisons are against the Tlx3 data: n.s.: not significant, \*:  $p < 0.05$ , \*\*:  $p < 0.01$ . See **Table S1** for  
431 all information on statistical testing.



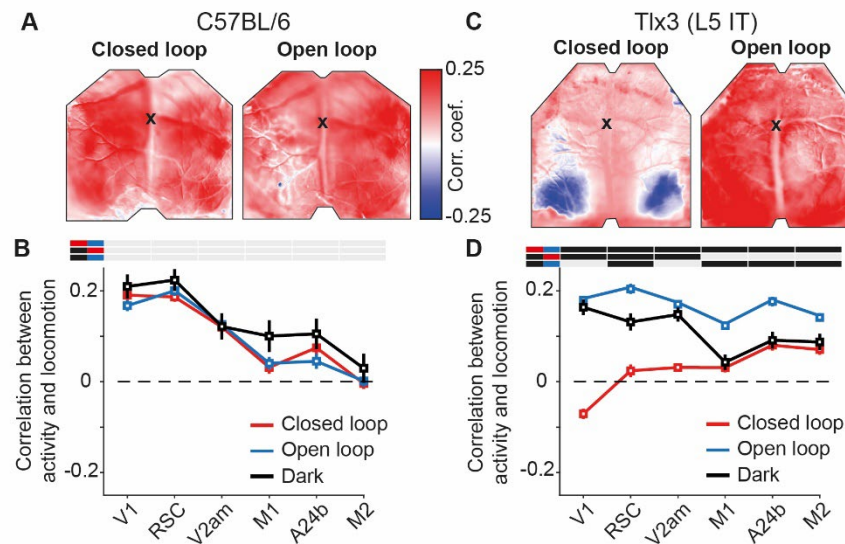

433 **Figure 2. L5 IT neurons were differentially activated by locomotion depending on the type of visual**  
434 **feedback.**

435 **(A)** Correlation between calcium activity and locomotion speed in the closed loop (left) and open  
436 loop (right) conditions, calculated for each pixel in the image for one example C57BL/6 mouse that  
437 expressed GCaMP brain wide. The black cross marks bregma. Activity in most of dorsal cortex  
438 correlates positively with locomotion in both closed and open loop conditions.

439 **(B)** Average correlation between calcium activity and locomotion speed in the 6 regions of interest in  
440 closed loop (red), open loop (blue) or dark (black) conditions in 6 C57BL/6 mice that expressed  
441 GCaMP brain wide (308, 316, and 68 5-minute sessions, respectively). Error bars indicate SEM over  
442 sessions. Bars above the plot indicate significant differences between conditions (compared  
443 conditions are indicated by colored line segments to the left, black:  $p < 0.05$ , gray: n.s., see **Table S1**  
444 for all information on statistical testing). On average, the correlation was highest in posterior dorsal  
445 cortex and was not different between conditions.

446 **(C)** As in **A**, but for an example Tlx3-Cre x Ai148 mouse that expressed GCaMP6 in L5 IT neurons.  
447 Correlations of calcium activity and locomotion speed were lower in the closed loop condition  
448 compared to the open loop condition, most prominently so in posterior regions of dorsal cortex.

449 **(D)** As in **B**, but for 15 Tlx3-Cre x Ai148 mice that expressed GCaMP6 in L5 IT neurons (data from 420  
450 closed loop, 394 open loop and 194 dark 5-minute sessions). Error bars indicate SEM over sessions.  
451 Correlation differed significantly between the closed loop and the open loop condition and was  
452 lowest in posterior dorsal cortex during the closed loop condition.



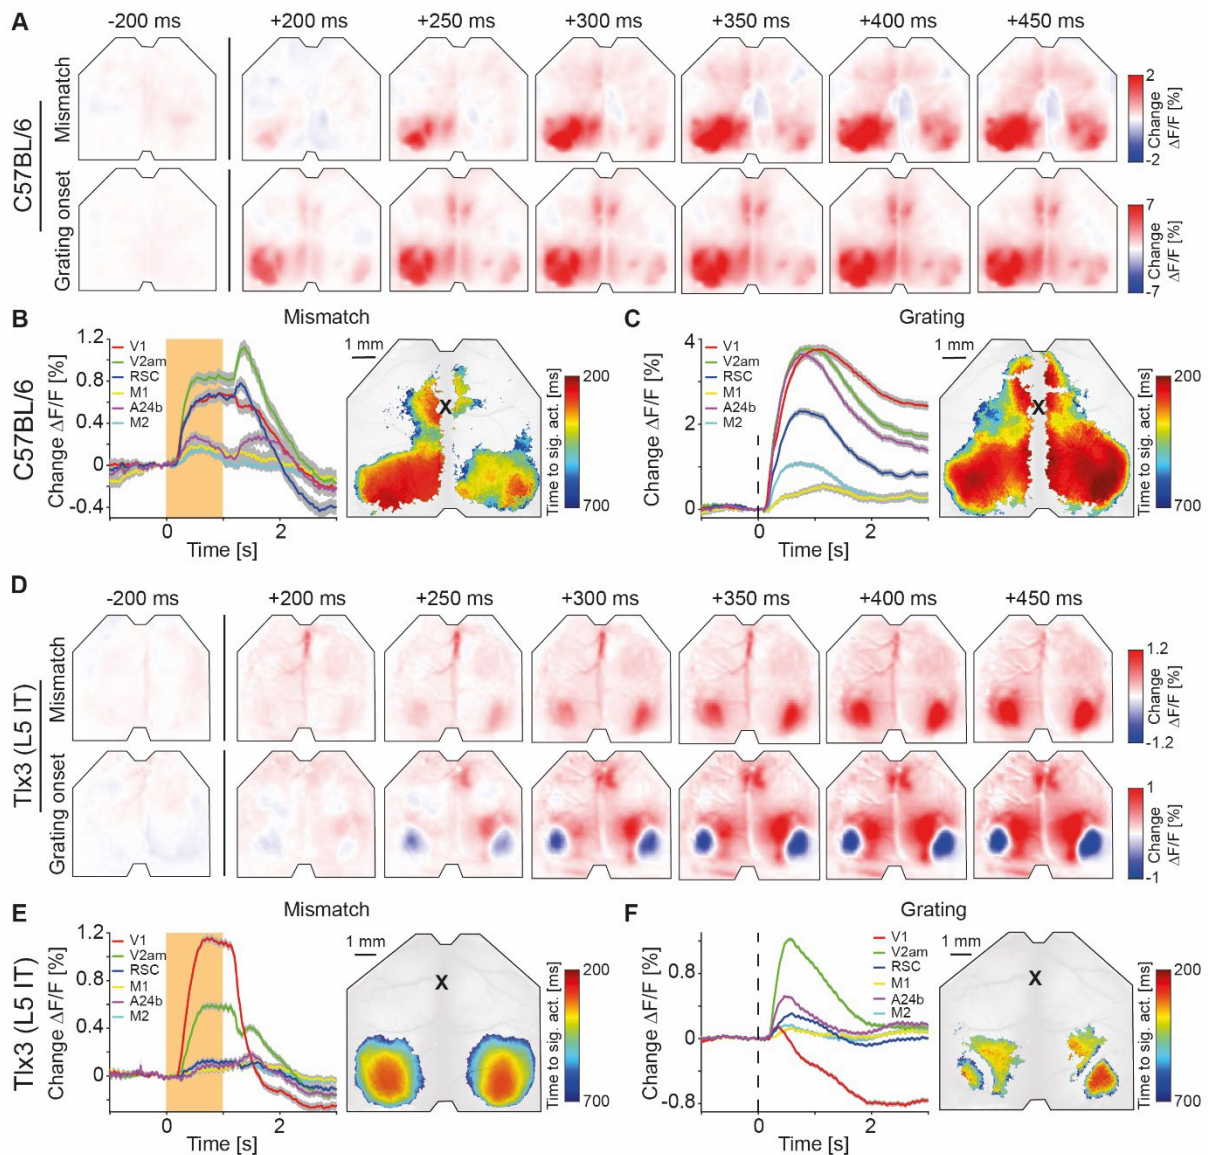

454 **Figure 3. Visuomotor prediction error responses in dorsal cortex originated in V1 and activated L5**  
 455 **IT neurons differentially.**

456 (A) Average responses to mismatch (230 onsets, top row) and drifting gratings (86 onsets, bottom  
 457 row) in an example C57BL/6 mouse that expressed GCaMP6 brain wide.

458 (B) Left: Average response to mismatch in C57BL/6 mice that expressed GCaMP brain wide (2512  
 459 onsets in 6 mice, activity was averaged across corresponding regions in both hemispheres). Shading  
 460 indicates SEM over onsets. Orange shading indicates duration of mismatch event. Right: Average  
 461 time to significant activation to mismatch in 6 C57BL/6 mice (see Methods), overlaid onto an  
 462 example image of a craniotomy. Black cross marks bregma.

463 (C) As in B, but for drifting grating responses (1858 onsets in 6 mice).

464 (D) As in A, but in an example Tlx3-Cre x Ai148 mouse that expressed GCaMP6 in L5 IT neurons  
 465 (mismatch, 292 onsets, top row; drifting gratings, 171 onsets, bottom row).

466 (E) As in **B**, but for Tlx3-Cre x Ai148 mice that expressed GCaMP6 in L5 IT neurons (3297 onsets in 15  
467 mice).

468 (F) As in **C**, but for Tlx3-Cre x Ai148 mice that expressed GCaMP6 in L5 IT neurons (5318 onsets in 15  
469 mice).

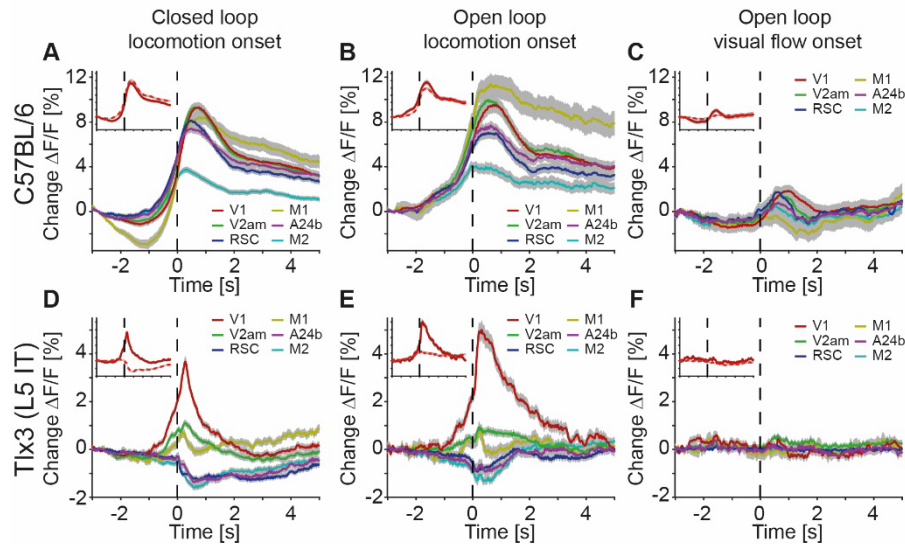

471 **Figure 4. Clozapine increased locomotion related responses in L5 IT neurons in V1.**

472 (A) Average response during closed loop locomotion onsets in C57BL/6 mice that expressed GCaMP  
473 brain wide (273 onsets in 4 mice, activity was averaged across corresponding regions in both  
474 hemispheres) after a single injection of the antipsychotic drug clozapine (see Methods). Shading  
475 indicates SEM over onsets. Inset: Comparison of responses for V1 in 4 naive C57BL/6 mice (dashed  
476 red, 720 onsets) and the same 4 mice after clozapine injection (dark red, same data as in main  
477 panel).

478 (B) As in A, but for open loop locomotion onsets after clozapine injection (145 onsets in 4 mice;  
479 inset: 570 onsets in the same 4 mice before injection).

480 (C) As in A, but for open loop visual flow onsets restricted to times when the mice were not  
481 locomoting (99 onsets in 4 mice; inset: 404 onsets in the same 4 mice before injection).

482 (D) Average response during closed loop locomotion onsets in Tlx3-Cre x Ai148 mice that expressed  
483 GCaMP6 in layer 5 IT neurons (707 onsets in 5 mice, activity was averaged across corresponding  
484 regions in both hemispheres) after a single injection of the antipsychotic drug clozapine (see  
485 Methods). Shading indicates SEM over onsets. Inset: Comparison of responses for V1 in 5 naive Tlx3-  
486 Cre x Ai148 mice (dashed red, 1101 onsets) and the same 5 mice after clozapine injection (dark red,  
487 same data as in main panel).

488 (E) As in D, but for open loop locomotion onsets (350 onsets in 5 mice; inset: 348 onsets in the same  
489 5 mice before injection).

490 (F) As in D, but for open loop visual flow onsets restricted to times when the mice were not  
491 locomoting (514 onsets in 5 mice; inset: 568 onsets in the same 5 mice before clozapine injection).

492

493

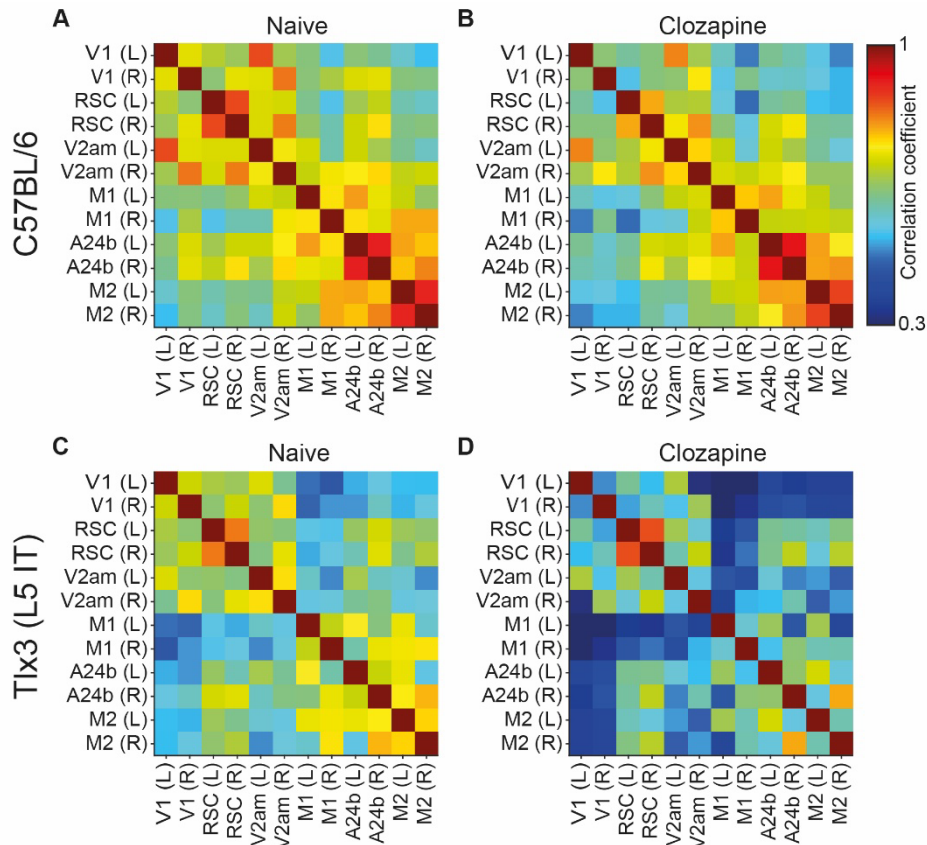

494

495 **Figure 5. Clozapine reduced activity correlations in dorsal cortex predominantly in L5 IT neurons.**

496 (A) Average correlation of activity between the 12 regions of interest in 4 C57BL/6 mice that  
497 expressed GCaMP brain wide.

498 (B) As in A, but after a single injection of the antipsychotic drug clozapine in the same 4 C57BL/6  
499 mice.

500 (C) Average correlation of activity between the 12 regions of interest in 5 Tlx3-Cre x Ai148 mice that  
501 expressed GCaMP6 in layer 5 IT neurons.

502 (D) As in C, but after a single injection of the antipsychotic drug clozapine in the same 5 Tlx3-Cre x  
503 Ai148 mice.

504

505

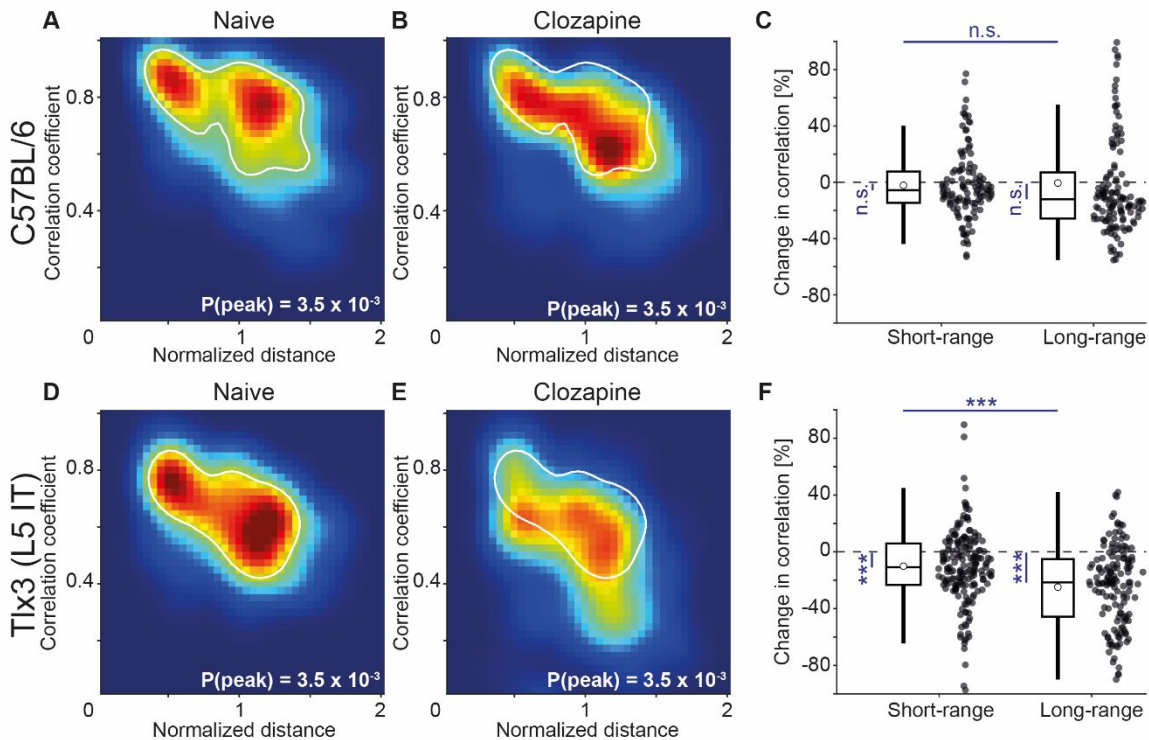

507 **Figure 6. L5 IT neurons exhibited the strongest clozapine induced reduction of long-range**  
508 **correlations.**

509 (A) Density map of correlation coefficients as a function of distance between the regions, normalized  
510 across mice by the bregma-lambda distance (see **Figure S5** and Methods), for 4 naive C57BL/6 mice  
511 that expressed GCaMP brain wide. Peak density is indicated at the bottom right of the plot and  
512 corresponds to the maximum value of the color scale (dark red). The white line is a contour line  
513 drawn at 50% of peak value.

514 (B) As in A, but for the same 4 C57BL/6 mice after a single injection of the antipsychotic drug  
515 clozapine. The white line is the contour line from panel A for comparison.

516 (C) Clozapine induced change in the activity correlation between regions, normalized to the  
517 correlation coefficient in the naive state, in 4 C57BL/6 mice. Data were split into short- and long-  
518 range activity correlations (see Methods). Boxes represent the median and the interquartile  
519 range. The open circle indicates the mean of the distribution. The whiskers mark 1.5 times the interquartile  
520 range. Dots are the individual data points (short-range: 122 pairs, long-range: 142 pairs). n.s.: not  
521 significant. See **Table S1** for all information on statistical testing.

522 (D) As in A, but for 5 Tlx3-Cre x Ai148 mice that expressed GCaMP6 in layer 5 IT neurons.

523 (E) As in B, but for 5 Tlx3-Cre x Ai148 mice that expressed GCaMP6 in layer 5 IT neurons. The white  
524 line is the contour line from panel D for comparison.

525 (F) As in C, but for 5 Tlx3-Cre x Ai148 mice that expressed GCaMP6 in layer 5 IT neurons (short-range:  
526 182 pairs, long-range: 148 pairs). \*\*\*:  $p < 0.001$ .



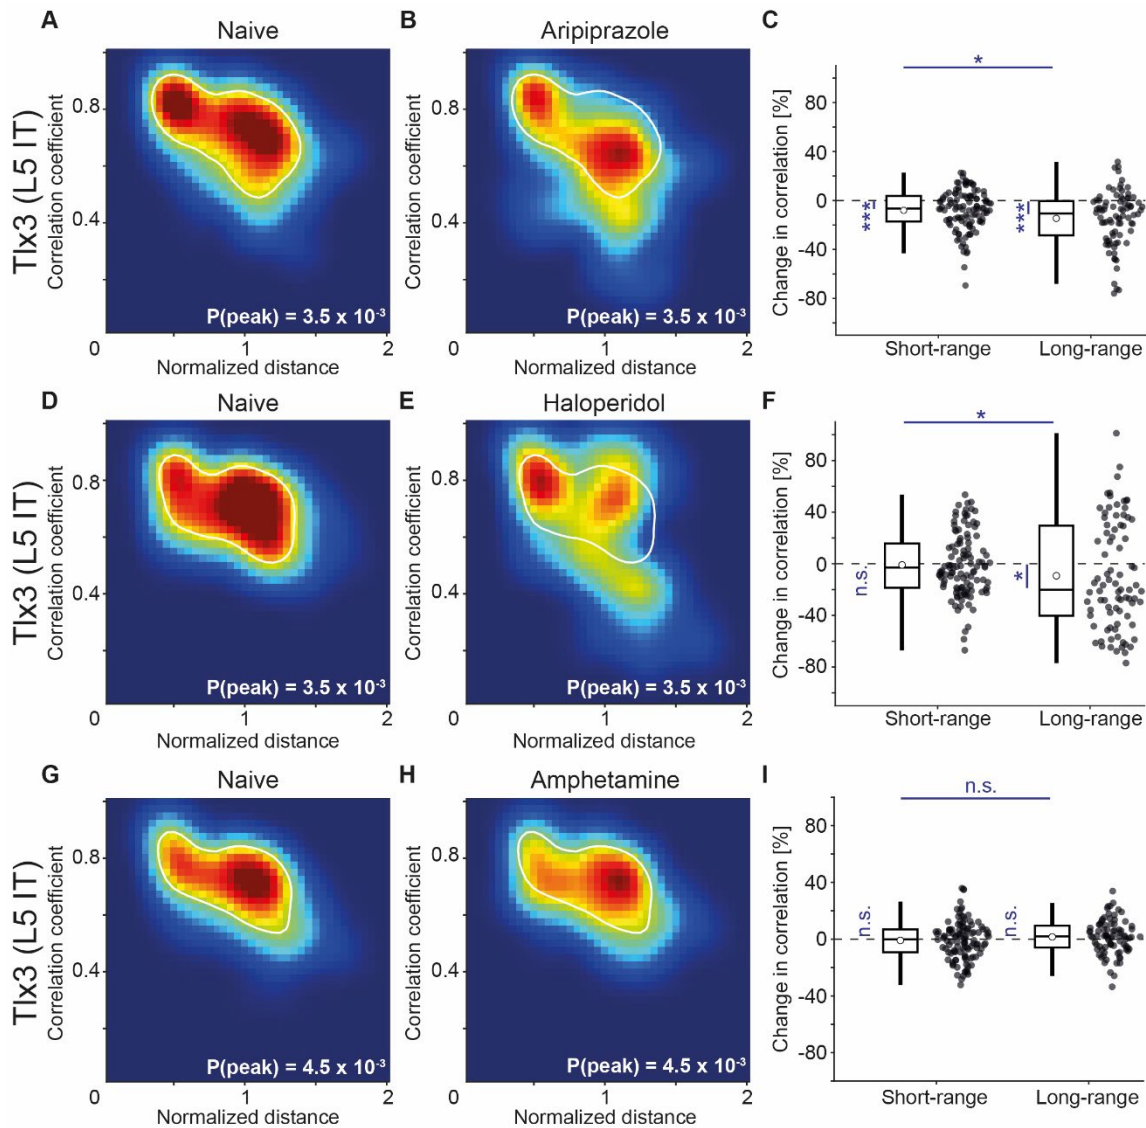

530 (A) Density map of correlation coefficients as a function of distance between the regions, normalized  
 531 across mice by the bregma-lambda distance (see **Figure S5** and Methods), for 3 Tlx3-Cre x Ai148  
 532 mice that expressed GCaMP6 in layer 5 IT neurons. Peak density is indicated at the bottom right of  
 533 the plot and corresponds to the maximum value of the color scale (dark red). The white line is a  
 534 contour line drawn at 50% of peak value.

535 (B) As in A, for the same 3 Tlx3-Cre x Ai148 mice, but after a single injection of the antipsychotic drug  
 536 aripiprazole. The white line is the contour line from panel A for comparison.

537 (C) Aripiprazole induced change in the activity correlation between regions, normalized to the  
 538 correlation coefficient in the naive state, in 3 Tlx3-Cre x Ai148 mice. Data were split into short- and  
 539 long-range activity correlations (see Methods). Boxes represent the median and the interquartile  
 540 range. The open circle indicates the mean of the distribution. The whiskers mark 1.5 times the

541 interquartile range. Dots are the individual data points (short-range: 114 pairs, long-range: 84 pairs).  
542 \*:  $p < 0.05$ , \*\*\*:  $p < 0.001$ . See **Table S1** for all information on statistical testing.

543 **(D)** As in **A**, but for 3 different Tlx3-Cre x Ai148 mice.

544 **(E)** As in **D**, for the same 3 Tlx3-Cre x Ai148 mice, but after a single injection of the antipsychotic drug  
545 haloperidol. The white line is the contour line from panel **D** for comparison.

546 **(F)** As in **C**, but for the 3 mice that had received a single injection of the antipsychotic drug  
547 haloperidol (short-range: 114 pairs, long-range: 84 pairs). \*:  $p < 0.05$ ; n.s.: not significant.

548 **(G)** As in **A**, but for 3 different Tlx3-Cre x Ai148 mice.

549 **(H)** As in **G**, for the same 3 Tlx3-Cre x Ai148 mice, but after a single injection of the psychostimulant  
550 amphetamine. The white line is the contour line from panel **G** for comparison.

551 **(I)** As in **D**, but for the 3 mice that had received a single injection of the psychostimulant  
552 amphetamine (short-range: 114 pairs, long-range: 84 pairs). n.s.: not significant.

553



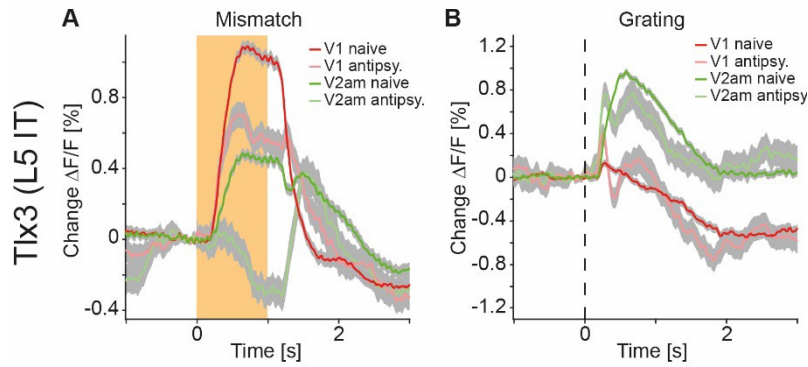

555 **Figure 8. Antipsychotic drug treatment reduced responses to and propagation of negative**  
556 **prediction errors.**

557 **(A)** Average responses to mismatch in Tlx3-Cre x Ai148 mice that expressed GCaMP6 in layer 5 IT  
558 neurons before (red: V1 naive, green: V2am naive, activity was averaged across corresponding  
559 regions in both hemispheres) and after (pale red: V1, pale green: V2am) injection of a single dose of  
560 an antipsychotic drug (data were averaged over all antipsychotics used: Clozapine: 5 mice,  
561 aripiprazole: 3 mice, and haloperidol: 3 mice). Orange shading indicates duration of mismatch event.  
562 Gray shading indicates SEM over onsets (naive: 2464 onsets, antipsychotic: 2017 onsets).

563 **(B)** As in **A**, but for drifting grating onsets (naive: 3942 onsets, antipsychotic: 1645 onsets).

564

565 SUPPLEMENTAL FIGURES

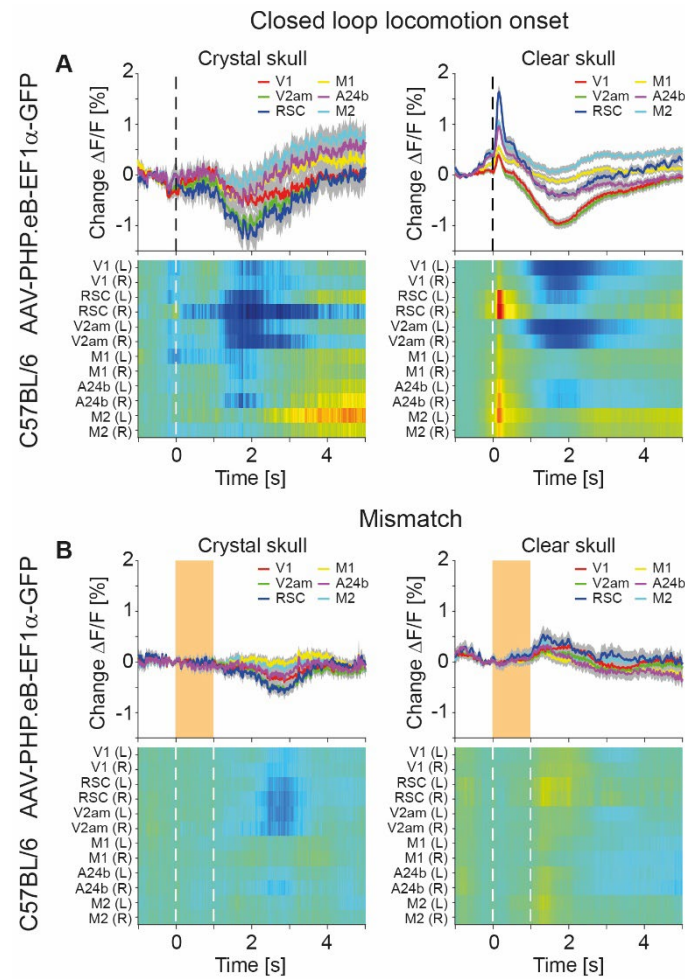

567 **Figure S1. Hemodynamic responses were reduced in a crystal skull preparation compared to a**  
568 **clear skull preparation. Related to Figure 1.**

569 (A) Average responses during closed loop locomotion onsets in C57BL/6 mice that expressed GFP  
570 brain wide using a crystal skull preparation (left: 3 mice, 96 locomotion onsets) or in similarly  
571 transfected mice using a clear skull preparation (right: 5 mice, 615 locomotion onsets) (see  
572 Methods). Top row shows the average activity of corresponding regions in dorsal cortex. Shading  
573 indicates SEM over onsets. The heatmaps in the bottom row show the responses for individual  
574 regions of interest. Heatmaps are scaled to the y-axis limits of the plot above (blue low, red high).  
575 Note, the fast onset transient apparent in the clear skull preparation was absent in the crystal skull  
576 preparation, while the slow decrease of activity was present in both. The increase in fluorescence at  
577 locomotion onset, which was primarily apparent in the clear skull preparation, is driven by  
578 hemodynamic occlusion.

579 (B) As in A, but for mismatch (left: 3 mice, 229 onsets, right: 5 mice, 228 onsets). Orange shading  
580 (top) or white dashed lines (bottom) indicate the duration of the mismatch stimulus.

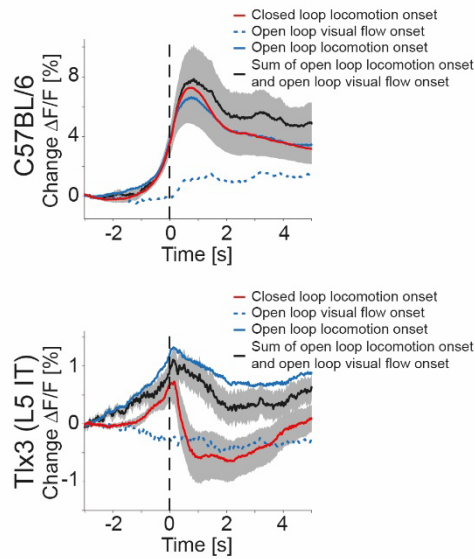

582 **Figure S2. The sum of locomotion and visual flow onset could not explain the closed loop**  
583 **locomotion onset response of L5 IT neurons. Related to Figure 1.**

584 Average responses during closed (red) and open loop (blue) locomotion onsets, as well as open loop  
585 visual flow (dashed blue) onsets, and the sum of open loop locomotion and open loop visual flow  
586 onsets (black). In C57BL/6 mice that expressed GCaMP brain wide (top, 6 mice), closed loop  
587 locomotion onset responses were larger than open loop locomotion onset responses, and part of  
588 this difference could be explained by the visual flow onset responses. In Tlx3-Cre x Ai148 that  
589 expressed GCaMP6 in layer 5 IT neurons (bottom, 15 mice), closed loop locomotion onset responses  
590 cannot be explained as the sum of open loop locomotion and visual flow onset. Shading indicates  
591 SEM over mice (omitted from open loop responses for clarity).

592

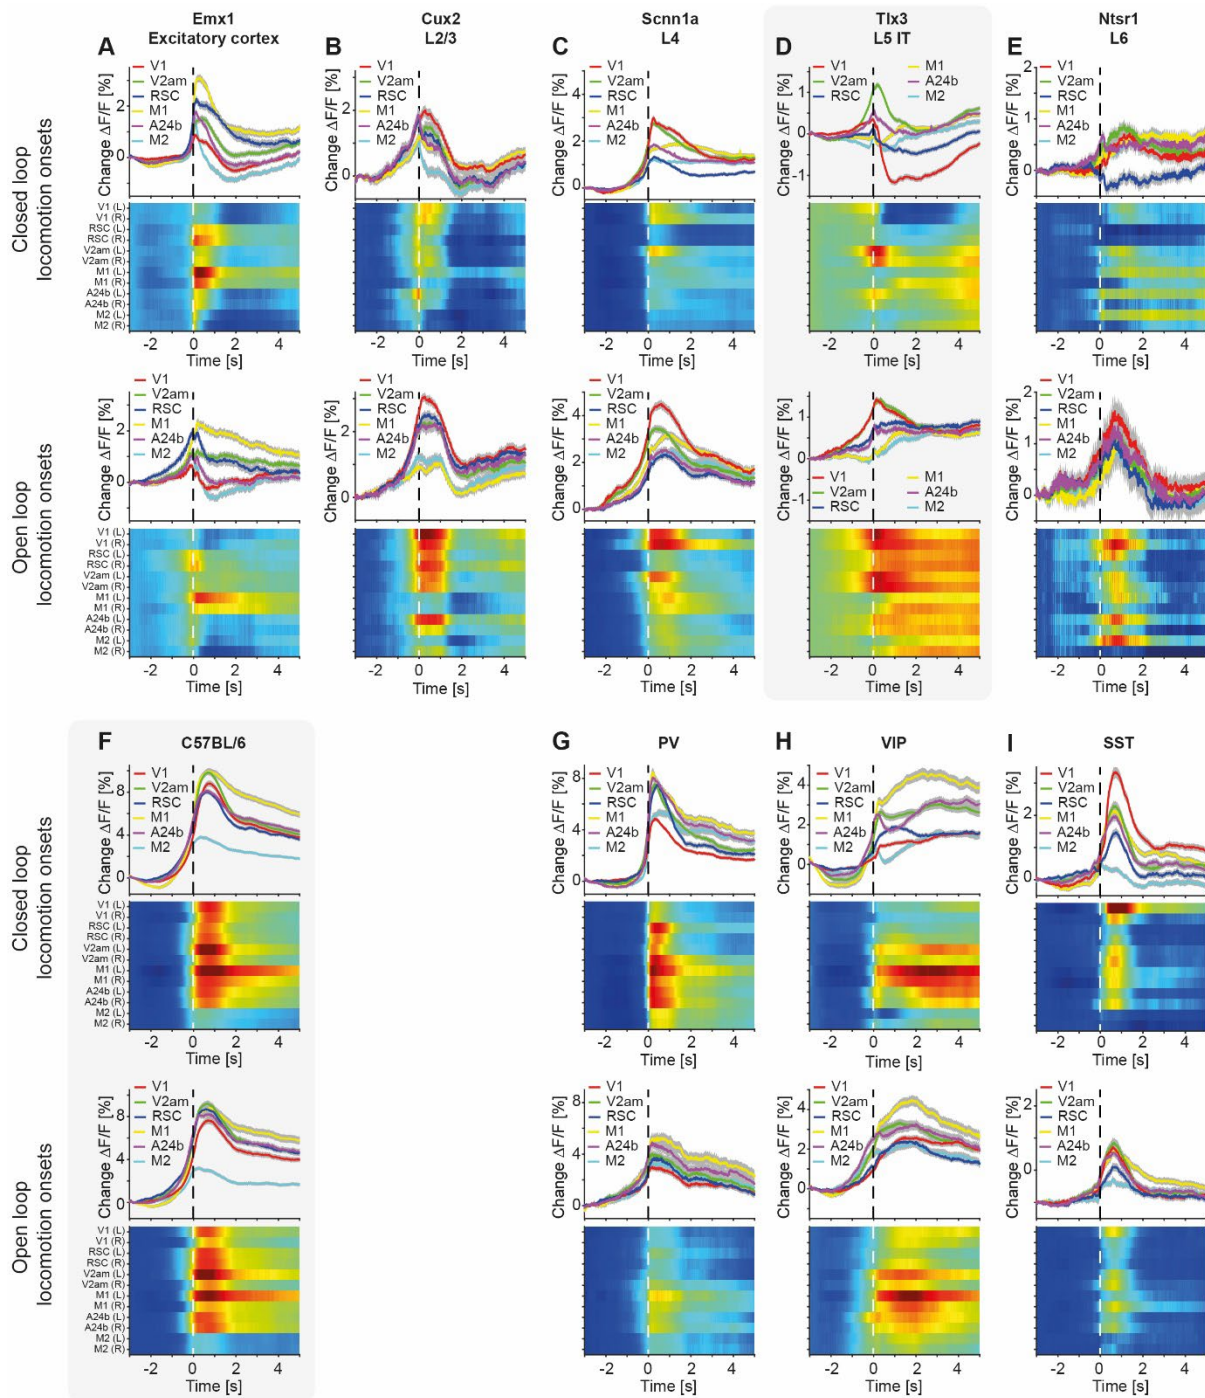

595 **Figure S3. L5 IT neurons had strikingly different responses during closed and open loop locomotion**  
 596 **onsets compared to other cortical neuron types. Related to Figure 1.**

597 (A) Average response during closed loop locomotion onsets (top, 438 onsets) and open loop  
 598 locomotion onsets (bottom, 286 onsets) in 4 Emx1-Cre mice that expressed GCaMP6 in excitatory  
 599 cortical neurons. Shading indicates SEM over onsets. Heatmaps are scaled to the y-axis limits of the  
 600 plot above (blue low, red high).

- 601 (B) As in A, but for 4 Cux2-CreERT2 x Ai148 mice that expressed GCaMP6 predominantly in L2/3  
602 excitatory neurons (415 closed loop and 433 open loop locomotion onsets).
- 603 (C) As in A, but for 7 Scnn1a-Cre x Ai148 mice that expressed GCaMP6 in L4 excitatory neurons (839  
604 closed loop and 313 open loop locomotion onsets).
- 605 (D) As in A, but for 15 Tlx3-Cre x Ai148 mice that expressed GCaMP6 specifically in L5 IT neurons  
606 (1919 closed loop and 1125 open loop locomotion onsets). Data are the same as in **Figures 1I and**  
607 **1K**.
- 608 (E) As in A, but for 3 Ntsr1-Cre x Ai148 mice that expressed GCaMP6 in excitatory L6 neurons (368  
609 closed loop and 112 open loop locomotion onsets).
- 610 (F) As in A, but for 6 C57BL/6 mice that expressed GCaMP brain wide (907 closed loop and 598 open  
611 loop locomotion onsets). Data are the same as in **Figures 1F and 1G**.
- 612 (G) As in A, but for 2 PV-Cre x Ai148 mice that expressed GCaMP6 in PV neurons (236 closed loop  
613 and 110 open loop locomotion onsets).
- 614 (H) As in A, but for 6 VIP-Cre x Ai148 mice that expressed GCaMP6 in VIP neurons (618 closed loop  
615 and 376 open loop locomotion onsets)
- 616 (I) As in A, but for 5 SST-Cre mice that expressed GCaMP6 in SST neurons (747 closed loop and 558  
617 open loop locomotion onsets).
- 618

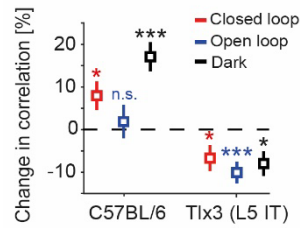

620 **Figure S4. Clozapine reduced the correlation between activity and locomotion in L5 IT neurons.**

621 **Related to Figure 4.**

622 Average correlation of activity and locomotion in dorsal cortex was increased after a single injection  
623 of the antipsychotic drug clozapine in 4 C57BL/6 mice that expressed GCaMP brain wide but  
624 decreased in 5 Tlx3-Cre x Ai148 mice that expressed GCaMP6 in layer 5 IT neurons, for all types of  
625 visual feedback. Error bars indicate SEM over mice and corresponding dorsal cortex regions (see  
626 Methods). n.s.: not significant, \*:  $p < 0.05$ , \*\*\*:  $p < 0.001$ . See **Table S1** for all information on  
627 statistical testing.

628



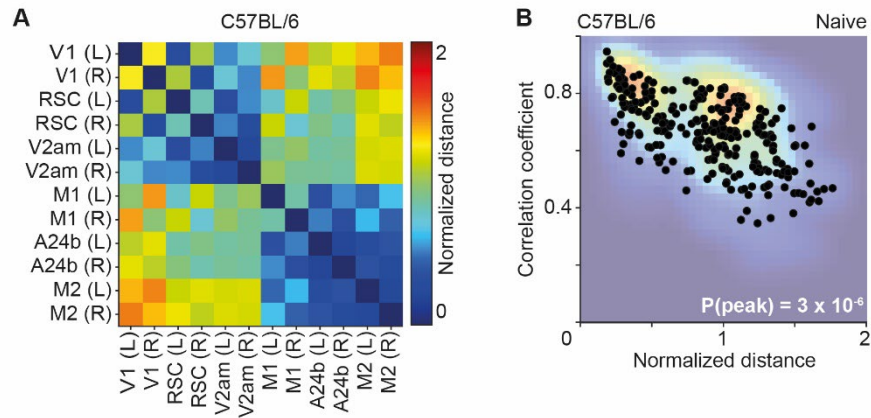

630 **Figure S5. Calculation of the distance-correlation heatmaps. Related to Figure 5.**

631 **(A)** For each pair of dorsal cortex regions, we calculated the distance between the regions in a top-  
632 down view of dorsal cortex, normalized by the distance between bregma and lambda for each  
633 mouse (data are from an example C57BL/6 mouse that expressed GCaMP6 brain wide).

634 **(B)** For each pair, we then plotted the activity correlation against this distance as calculated in **A**  
635 (black dots). We then interpolated this distribution using a 40-by-40 2D grid to obtain the density  
636 plots (faded background), shown for all mice and pairs in **Figures 5, 6 and S6**.

637



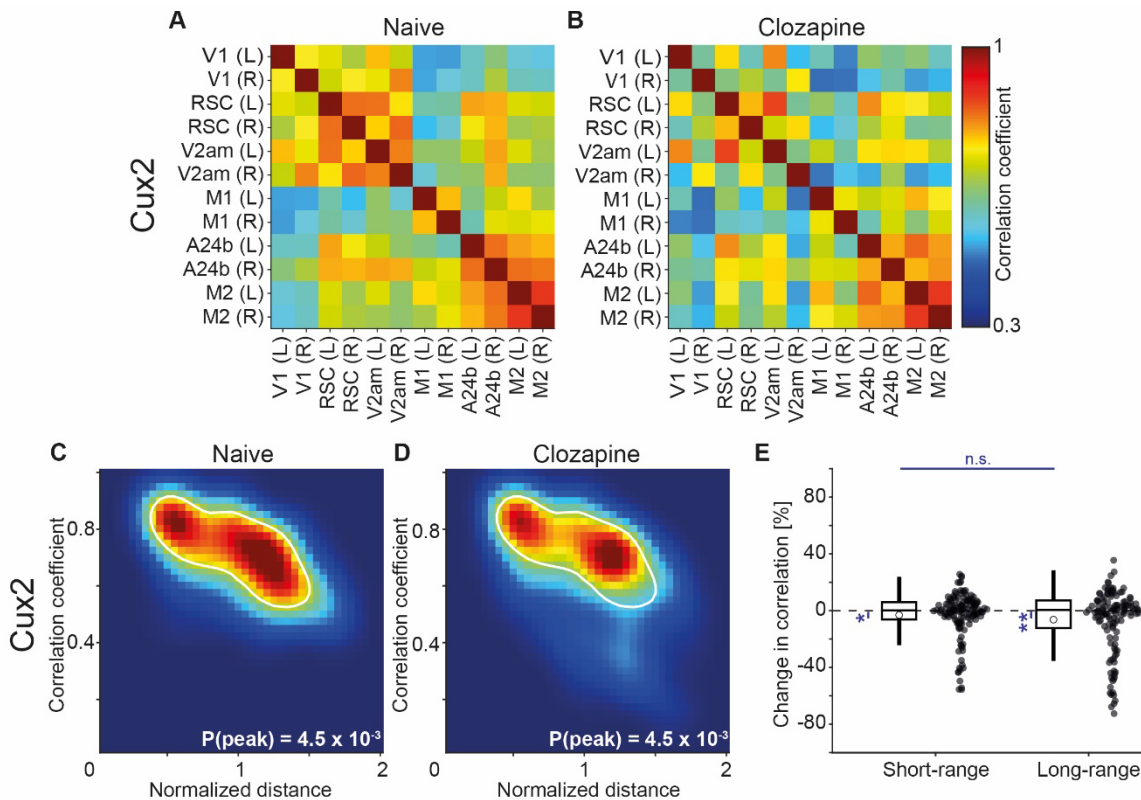

639 **Figure S6. The clozapine induced decorrelation of dorsal cortex activity was weaker in superficial**  
 640 **cortical layers than in L5. Related to Figure 5.**

641 (A) Average correlation of activity between the 12 regions of interest in 4 Cux2-CreERT2 x Ai148 mice  
 642 that expressed GCaMP6 predominantly in layer 2/3 excitatory cortical neurons.

643 (B) As in A, but for the same 4 Cux2-CreERT2 x Ai148 mice after a single injection of the antipsychotic  
 644 drug clozapine.

645 (C) Density map of correlation coefficients as a function of distance between the regions, normalized  
 646 across mice by the bregma-lambda distance (see Figure S5 and Methods), for 4 naive Cux2-CreERT2  
 647 x Ai148 mice that expressed GCaMP6 predominantly in layer 2/3 cortical neurons. Peak density is  
 648 indicated at the bottom right of the plot and corresponds to the maximum value of the color scale  
 649 (dark red). The white line is a contour line drawn at 50% of peak value.

650 (D) As in C, but for the same 4 Cux2-CreERT2 x Ai148 mice after a single injection of the antipsychotic  
 651 drug clozapine. The white line is the contour line from panel C for comparison.

652 (E) Clozapine induced change in the activity correlation between regions, normalized to the  
 653 correlation coefficient in the naive state, in 4 Cux2-CreERT2 x Ai148 mice. Data were split into short-  
 654 and long-range activity correlations (see Methods). Boxes represent the median and the  
 655 interquartile range. The open circle indicates the mean of the distribution. The whiskers mark 1.5  
 656 times the interquartile range. Dots are the individual data points (short-range: 122 pairs, long-range:  
 657 142 pairs). n.s.: not significant, \*:  $p < 0.05$ , \*\*:  $p < 0.01$ . See Table S1 for all information on statistical  
 658 testing.

659 **SUPPLEMENTAL TABLES**

660 **Table S1. Statistical comparisons for bar and violin plots.**

| Figure reference | Description<br>(N <sub>1</sub> vs N <sub>2</sub> ) | Test     | N <sub>1</sub> (mice) | N <sub>2</sub> (mice) | Unit     | P-value            |
|------------------|----------------------------------------------------|----------|-----------------------|-----------------------|----------|--------------------|
| <b>Figure 1L</b> | Tlx3 vs C57BL/6                                    | T-test   | 12 (15)               | 12 (6)                | Regions  | 0.0012             |
|                  | Tlx3 vs Emx1                                       | T-test   | 12 (15)               | 12 (4)                | Regions  | 0.0019             |
|                  | Tlx3 vs Cux2                                       | T-test   | 12 (15)               | 12 (4)                | Regions  | 0.0045             |
|                  | Tlx3 vs Scnn1a                                     | T-test   | 12 (15)               | 12 (7)                | Regions  | 0.0025             |
|                  | Tlx3 vs Ntsr1                                      | T-test   | 12 (15)               | 12 (3)                | Regions  | 0.9175             |
|                  | Tlx3 vs PV                                         | T-test   | 12 (15)               | 12 (2)                | Regions  | 0.0033             |
|                  | Tlx3 vs VIP                                        | T-test   | 12 (15)               | 12 (6)                | Regions  | 0.0080             |
|                  | Tlx3 vs SST                                        | T-test   | 12 (15)               | 12 (5)                | Regions  | 0.0384             |
| <b>Figure 2B</b> | V1                                                 |          |                       |                       |          |                    |
|                  | Closed loop vs open loop                           | Rank-sum | 308 (6)               | 316 (6)               | Sessions | 0.1088             |
|                  | Closed loop vs dark                                | Rank-sum | 308 (6)               | 68 (6)                | Sessions | 0.4131             |
|                  | Open loop vs dark                                  | Rank-sum | 316 (6)               | 68 (6)                | Sessions | 0.1064             |
|                  | RSC                                                |          |                       |                       |          |                    |
|                  | Closed loop vs open loop                           | Rank-sum | 308 (6)               | 316 (6)               | Sessions | 0.5522             |
|                  | Closed loop vs dark                                | Rank-sum | 308 (6)               | 68 (6)                | Sessions | 0.0786             |
|                  | Open loop vs dark                                  | Rank-sum | 316 (6)               | 68 (6)                | Sessions | 0.2343             |
|                  | V2am                                               |          |                       |                       |          |                    |
|                  | Closed loop vs open loop                           | Rank-sum | 308 (6)               | 316 (6)               | Sessions | 0.7924             |
|                  | Closed loop vs dark                                | Rank-sum | 308 (6)               | 68 (6)                | Sessions | 0.8326             |
|                  | Open loop vs dark                                  | Rank-sum | 316 (6)               | 68 (6)                | Sessions | 0.9669             |
|                  | M1                                                 |          |                       |                       |          |                    |
|                  | Closed loop vs open loop                           | Rank-sum | 308 (6)               | 316 (6)               | Sessions | 0.9640             |
|                  | Closed loop vs dark                                | Rank-sum | 308 (6)               | 68 (6)                | Sessions | 0.0974             |
|                  | Open loop vs dark                                  | Rank-sum | 316 (6)               | 68 (6)                | Sessions | 0.1597             |
|                  | A24b                                               |          |                       |                       |          |                    |
|                  | Closed loop vs open loop                           | Rank-sum | 308 (6)               | 316 (6)               | Sessions | 0.1549             |
|                  | Closed loop vs dark                                | Rank-sum | 308 (6)               | 68 (6)                | Sessions | 0.4190             |
|                  | Open loop vs dark                                  | Rank-sum | 316 (6)               | 68 (6)                | Sessions | 0.1540             |
|                  | M2                                                 |          |                       |                       |          |                    |
|                  | Closed loop vs open loop                           | Rank-sum | 308 (6)               | 316 (6)               | Sessions | 0.7265             |
|                  | Closed loop vs dark                                | Rank-sum | 308 (6)               | 68 (6)                | Sessions | 0.6720             |
|                  | Open loop vs dark                                  | Rank-sum | 316 (6)               | 68 (6)                | Sessions | 0.6075             |
| <b>Figure 2D</b> | V1                                                 |          |                       |                       |          |                    |
|                  | Closed loop vs open loop                           | Rank-sum | 420 (15)              | 394 (15)              | Sessions | <10 <sup>-10</sup> |
|                  | Closed loop vs dark                                | Rank-sum | 420 (15)              | 194 (15)              | Sessions | <10 <sup>-10</sup> |
|                  | Open loop vs dark                                  | Rank-sum | 394 (15)              | 194 (15)              | Sessions | 0.6851             |
|                  | RSC                                                |          |                       |                       |          |                    |
|                  | Closed loop vs open loop                           | Rank-sum | 420 (15)              | 394 (15)              | Sessions | <10 <sup>-10</sup> |
|                  | Closed loop vs dark                                | Rank-sum | 420 (15)              | 194 (15)              | Sessions | <10 <sup>-4</sup>  |
|                  | Open loop vs dark                                  | Rank-sum | 394 (15)              | 194 (15)              | Sessions | 0.0010             |
|                  | V2am                                               |          |                       |                       |          |                    |
|                  | Closed loop vs open loop                           | Rank-sum | 420 (15)              | 394 (15)              | Sessions | <10 <sup>-10</sup> |
|                  | Closed loop vs dark                                | Rank-sum | 420 (15)              | 194 (15)              | Sessions | <10 <sup>-9</sup>  |
|                  | Open loop vs dark                                  | Rank-sum | 394 (15)              | 194 (15)              | Sessions | 0.1570             |
|                  | M1                                                 |          |                       |                       |          |                    |
|                  | Closed loop vs open loop                           | Rank-sum | 420 (15)              | 394 (15)              | Sessions | <10 <sup>-9</sup>  |
|                  | Closed loop vs dark                                | Rank-sum | 420 (15)              | 194 (15)              | Sessions | 0.5668             |
|                  | Open loop vs dark                                  | Rank-sum | 394 (15)              | 194 (15)              | Sessions | <10 <sup>-4</sup>  |

|                   |                           |          |          |          |          |                    |
|-------------------|---------------------------|----------|----------|----------|----------|--------------------|
|                   | A24b                      |          |          |          |          |                    |
|                   | Closed loop vs open loop  | Rank-sum | 420 (15) | 394 (15) | Sessions | <10 <sup>-7</sup>  |
|                   | Closed loop vs dark       | Rank-sum | 420 (15) | 194 (15) | Sessions | 0.6103             |
|                   | Open loop vs dark         | Rank-sum | 394 (15) | 194 (15) | Sessions | 0.0001             |
|                   | M2                        |          |          |          |          |                    |
|                   | Closed loop vs open loop  | Rank-sum | 420 (15) | 394 (15) | Sessions | <10 <sup>-4</sup>  |
|                   | Closed loop vs dark       | Rank-sum | 420 (15) | 194 (15) | Sessions | 0.5034             |
|                   | Open loop vs dark         | Rank-sum | 394 (15) | 194 (15) | Sessions | 0.0111             |
| <b>Figure 6C</b>  | Short-range vs no change  | T-test   | 122 (4)  | -        | Pairs    | 0.3791             |
|                   | Long-range vs no change   | T-test   | 142 (4)  | -        | Pairs    | 0.9035             |
|                   | Short-range vs long-range | Rank-sum | 122 (4)  | 142 (4)  | Pairs    | 0.0511             |
| <b>Figure 6F</b>  | Short-range vs no change  | T-test   | 182 (5)  | -        | Pairs    | <10 <sup>-5</sup>  |
|                   | Long-range vs no change   | T-test   | 148 (5)  | -        | Pairs    | <10 <sup>-10</sup> |
|                   | Short-range vs long-range | Rank-sum | 182 (5)  | 148 (5)  | Pairs    | <10 <sup>-4</sup>  |
| <b>Figure 7C</b>  | Short-range vs no change  | T-test   | 114 (3)  | -        | Pairs    | <10 <sup>-5</sup>  |
|                   | Long-range vs no change   | T-test   | 84 (3)   | -        | Pairs    | <10 <sup>-7</sup>  |
|                   | Short-range vs long-range | Rank-sum | 114 (3)  | 84 (3)   | Pairs    | 0.0347             |
| <b>Figure 7F</b>  | Short-range vs no change  | T-test   | 114 (3)  | -        | Pairs    | 0.7058             |
|                   | Long-range vs no change   | T-test   | 84 (3)   | -        | Pairs    | 0.0435             |
|                   | Short-range vs long-range | Rank-sum | 114 (3)  | 84 (3)   | Pairs    | 0.0199             |
| <b>Figure 7I</b>  | Short-range vs no change  | T-test   | 114 (3)  | -        | Pairs    | 0.4865             |
|                   | Long-range vs no change   | T-test   | 84 (3)   | -        | Pairs    | 0.2184             |
|                   | Short-range vs long-range | Rank-sum | 114 (3)  | 84 (3)   | Pairs    | 0.1633             |
| <b>Figure S4</b>  | C57BL/6                   |          |          |          |          |                    |
|                   | Closed loop vs no change  | T-test   | 24 (4)   | -        | Regions  | 0.0277             |
|                   | Open loop vs no change    | T-test   | 24 (4)   | -        | Regions  | 0.6384             |
|                   | Dark vs no change         | T-test   | 24 (4)   | -        | Regions  | <10 <sup>-4</sup>  |
|                   | Tlx3                      |          |          |          |          |                    |
|                   | Closed loop vs no change  | T-test   | 30 (5)   | -        | Regions  | 0.0365             |
|                   | Open loop vs no change    | T-test   | 30 (5)   | -        | Regions  | 0.0004             |
|                   | Dark vs no change         | T-test   | 30 (5)   | -        | Regions  | 0.0104             |
| <b>Figure S6E</b> | Short-range vs no change  | T-test   | 137 (4)  | -        | Pairs    | 0.0262             |
|                   | Long-range vs no change   | T-test   | 127 (4)  | -        | Pairs    | 0.0019             |
|                   | Short-range vs long-range | Rank-sum | 137 (4)  | 127 (4)  | Pairs    | 0.9537             |

661

662

663 **Table S2. Indicator expression strategy in individual mice.**

| <b>Nbr. mice</b> | <b>Genotype</b>      | <b>Virus</b>                          | <b>Figures</b>                                                                      |
|------------------|----------------------|---------------------------------------|-------------------------------------------------------------------------------------|
| 3                | C57BL/6              | AAV-PHP.eB-hSyn1-jGCaMP7f             | <b>1C, 1F-1H, 1L, 2A and 2B, 3A-3C, 4A-4C, 5A and 5B, 6A-6C, S2, S3F, S4 and S5</b> |
| 3                | C57BL/6              | AAV-PHP.eB-EF1 $\alpha$ -GCaMP6s      | <b>1F-1H, 1L, 2B, 3B and 3C, 4A-4C, 5A and 5B, 6A-6C, S2, S3F, S4</b>               |
| 8                | C57BL/6              | AAV-PHP.eB-EF1 $\alpha$ -GFP          | <b>S1</b>                                                                           |
| 4                | Emx1-Cre             | AAV-PHP.eB-DIO-EF1 $\alpha$ -GCaMP6s  | <b>1L and S3A</b>                                                                   |
| 4                | Cux2-CreERT2 x Ai148 | -                                     | <b>1L, S3B and S6</b>                                                               |
| 7                | Scnn1a-Cre x Ai148   | -                                     | <b>1L and S3C</b>                                                                   |
| 15               | Tlx3-Cre x Ai148     | -                                     | <b>1D, 1I-1L, 2C and 2D, 3D-3F, 4D-4F, 5C and 5D, 6D-6F, 7, 8, S2, S3D and S4</b>   |
| 3                | Ntsr1-Cre x Ai148    | -                                     | <b>1L and S3E</b>                                                                   |
| 2                | PV-Cre x Ai148       | -                                     | <b>1L and S3G</b>                                                                   |
| 6                | VIP-Cre x Ai148      | -                                     | <b>1L and S3H</b>                                                                   |
| 4                | SST-Cre              | AAV-PHP.eB-DIO-EF1 $\alpha$ -jGCaMP7f | <b>1L and S3I</b>                                                                   |
| 1                | SST-Cre x Ai148      | -                                     | <b>1L and S3I</b>                                                                   |

664

665 **METHODS**

666 **Key Resource Table**

| REAGENT or RESOURCE                                                        | Source                       | Identifier                |
|----------------------------------------------------------------------------|------------------------------|---------------------------|
| <b>Bacterial and virus strains</b>                                         |                              |                           |
| AAV-PHP.eb-hSyn1-jGCaMP7f (10 <sup>13</sup> GC/ml)                         | FMI vector core              | vector.fmi.ch             |
| AAV-PHP.eb-EF1 $\alpha$ -GCaMP6s (10 <sup>13</sup> GC/ml)                  | FMI vector core              | vector.fmi.ch             |
| AAV-PHP.eb-DIO-EF1 $\alpha$ -GCaMP6s (10 <sup>13</sup> GC/ml)              | FMI vector core              | vector.fmi.ch             |
| AAV-PHP.eb-DIO-EF1 $\alpha$ -jGCaMP7f (10 <sup>12</sup> GC/ml)             | FMI vector core              | vector.fmi.ch             |
| AAV-PHP.eb-EF1 $\alpha$ -GFP (10 <sup>13</sup> GC/ml)                      | FMI vector core              | vector.fmi.ch             |
| <b>Chemicals, peptides, and recombinant proteins</b>                       |                              |                           |
| Fentanyl citrate                                                           | Actavis                      | CAS 990-73-8              |
| Midazolam (Dormicum)                                                       | Roche                        | CAS 59467-96-8            |
| Medetomidine (Domitor)                                                     | Orion Pharma                 | CAS 86347-14-0            |
| Ropivacaine                                                                | Presenius Kabi               | CAS 132112-35-7           |
| Lidocaine                                                                  | Bichsel                      | CAS 137-58-6              |
| Buprenorphine                                                              | Reckitt Benckiser Healthcare | CAS 52485-79-7            |
| Ophthalmic gel (Humigel)                                                   | Virbac                       | N/A                       |
| Flumazenil (Anexate)                                                       | Roche                        | CAS 78755-81-4            |
| Atipamezole (Antisedan)                                                    | Orion Pharma                 | CAS 104054-27-5           |
| N-Butyl-2-cyanoacrylate (Histoacryl)                                       | Braun                        | CAS 6606-65-1             |
| Dental cement (Paladur)                                                    | Heraeus Kulzer               | CAS 9066-86-8             |
| Metacam                                                                    | Boehringer Ingelheim         | CAS 71125-39-8            |
| Clozapine (powder)                                                         | Novartis                     | CAS 5786-21-0             |
| Aripiprazole (intramuscular injection solution 7.5 mg/ml)                  | Otsuka Pharmaceutical        | CAS 129722-12-9           |
| Haloperidol (intramuscular injection solution 5 mg/ml)                     | Janssen                      | CAS 52-86-8               |
| Amphetamine (powder)                                                       | Hänseler                     | CAS 60-13-9               |
| Tamoxifen food                                                             | Envigo                       | CAS 10540-29-1 (TD.55125) |
| <b>Deposited data</b>                                                      |                              |                           |
| All data and code used to generate manuscript figures                      | This paper                   | data.fmi.ch               |
| <b>Experimental models: Organisms/strains</b>                              |                              |                           |
| <i>Mus musculus</i> : C57BL/6                                              | Charles River                | N/A                       |
| <i>Mus musculus</i> : Emx1 <sup>tm1(cre)Krij</sup>                         | Jackson Laboratories         | RRID:IMSR_JAX:005628      |
| <i>Mus musculus</i> : B6(Cg)-Cux2 <sup>tm3.1(cre/ERT2)Mull</sup> /Mmmh     | MMRRC                        | RRID:MMRRC_032779-MU      |
| <i>Mus musculus</i> : Scnn1a-cre3Aibs/J                                    | Jackson Laboratories         | RRID:IMSR_JAX:009613      |
| <i>Mus musculus</i> : Tg(Tlx3-cre)PL56Gsat/Mmucd                           | MMRRC                        | RRID:MMRRC_041158-UCD     |
| <i>Mus musculus</i> : Ntsr1 <sup>GN220Gsat/Mmucd</sup>                     | MMRRC                        | RRID:MMRRC_017266-UCD     |
| <i>Mus musculus</i> : Pvalb <sup>tm1(cre)Arbr</sup>                        | Jackson Laboratories         | RRID:IMSR_JAX:008069      |
| <i>Mus musculus</i> : Vip <sup>tm1(cre)Zjh</sup>                           | Jackson Laboratories         | RRID:IMSR_JAX:010908      |
| <i>Mus musculus</i> : Sst <sup>tm2.1(cre)Zjh</sup>                         | Jackson Laboratories         | RRID:IMSR_JAX:018973      |
| <i>Mus musculus</i> : Igs7 <sup>tm148.1(tetO-GCaMP6f,CAG-tTA2)Hze</sup> /J | Jackson Laboratories         | RRID:IMSR_JAX:030328      |
| <b>Software and algorithms</b>                                             |                              |                           |
| MATLAB (2021a)                                                             | The MathWorks                | RRID: SCR_001622          |
| LabVIEW                                                                    | National Instruments         | RRID: SCR_014325          |
| Python                                                                     | python.org                   | RRID: SCR_008394          |
| Panda3D                                                                    | panda3d.org                  | N/A                       |

667

668 **Mice.** All animal procedures were approved by and carried out in accordance with guidelines of the  
669 Veterinary Department of the Canton Basel-Stadt, Switzerland. The mice used for widefield imaging  
670 in this study were kept on a C57BL/6 background and were of the following genotype: 6 C57BL/6  
671 (Charles River Laboratories), 4 Emx1-Cre (Gorski et al., 2002), 4 Cux2-CreERT2 (Franco et al., 2012), 7  
672 Scnn1a-Cre (Madisen et al., 2010), 15 Tlx3-Cre (Gerfen et al., 2013), 3 Ntsr1-Cre (Gong et al., 2007), 2  
673 PV-Cre (Hippenmeyer et al., 2005), 6 VIP-Cre (Taniguchi et al., 2011), and 5 SST-Cre (Taniguchi et al.,  
674 2011) mice. Ai148 ((Daigle et al., 2018), Jackson Laboratories, stock #030328) mice were used as  
675 breeders to drive GCaMP6f expression in Cre positive neurons. 8 C57BL/6 mice were used in  
676 experiments controlling for hemodynamic responses. To induce expression of Cre in the Cux2-  
677 CreERT2 line, mice were provided for at least 1 week with tamoxifen containing food (Envigo, 400  
678 mg tamoxifen per kg of food) as their sole food source. Mice were group housed in a vivarium  
679 (light/dark cycle: 12/12 hours). Experimental mice were of either sex.

680 **Surgery and virus injections.** For all surgical procedures, mice were anesthetized using a mixture of  
681 fentanyl (0.05 mg/kg; Actavis), midazolam (5.0 mg/kg; Dormicum, Roche), and medetomidine (0.5  
682 mg/kg; Domitor, Orion). In a subset of mice (6 C57BL/6, 4 Emx1-Cre, and 4 SST-Cre mice), we  
683 injected an AAV vector based on the PHP.eB capsid (Chan et al., 2017) retroorbitally (6  $\mu$ l each eye of  
684 at least  $10^{13}$  GC/ml) to drive expression of GCaMP under either the EF1 $\alpha$  or hSyn1 promoter pan-  
685 neuronally, or in a cell type specific manner using a double-floxed inverted open reading frame (DIO)  
686 construct. For hemodynamic response control experiments (**Figure S1**), we used an AAV-PHP.eb-  
687 EF1 $\alpha$ -GFP to pan-neuronally express GFP. To improve optical access to the cortex, we implanted  
688 crystal skull cranial windows (Kim et al., 2016). Prior to removing the skull plate overlying dorsal  
689 cortex, we recorded the location of bregma relative to other landmarks on the skull. Superglue  
690 (Pattex) was used to glue the crystal skull in place in the craniotomy. In a subset of mice, for the  
691 comparison of hemodynamic responses (**Figure S1**), we used a clear skull preparation (Guo et al.,  
692 2014). To do this, we attached the crystal skull coverslip directly onto the cleaned skull surface with  
693 a three-component polymer (C&B Metabond, Parkell). A custom-machined titanium head bar was  
694 attached to the skull using dental cement (Paladur, Heraeus). An epifluorescence overview image  
695 was taken to mark reference points on the dorsal cortical surface. Anesthesia was antagonized by an  
696 intraperitoneal injection of a mixture of flumazenil (0.5 mg/kg; Anexate, Roche) and atipamezole  
697 (2.5 mg/kg; Antisedan, Orion Pharma). For peri- and post-operative analgesia we injected  
698 buprenorphine (0.1 mg/kg; Reckitt Benckiser Healthcare (UK) Ltd.) and Metacam (5 mg/kg;  
699 Boehringer Ingelheim). Imaging commenced at the earliest 1 week after head bar implantation or 3  
700 weeks after retroorbital AAV injection. Clozapine (Novartis), aripiprazole (Otsuka Pharmaceutical),

701 haloperidol (Janssen), or amphetamine (Hänseler) was intraperitoneally injected at 0.2  $\mu\text{g/g}$ , 0.2  
702  $\mu\text{g/g}$ , 0.1  $\mu\text{g/g}$  or 4  $\mu\text{g/g}$  body weight, respectively.

703 **Virtual reality setup and stimulus design.** For all experiments we used a virtual reality setup as  
704 previously described (Leinweber et al., 2014). Mice were head-fixed and free to run on a spherical,  
705 air-supported Styrofoam ball. A virtual corridor was projected (using a Samsung SP-F10M projector)  
706 onto a toroidal screen positioned in front of the mouse covering a field of view of approximately 240  
707 degrees horizontally and 100 degrees vertically. Recordings were blocked into 5-minute sessions.  
708 Experiments typically commenced with 4 sessions of a closed loop condition in which the rotation of  
709 the spherical treadmill was coupled to the movement in a virtual corridor. To introduce mismatches,  
710 we broke the coupling between locomotion and visual flow by briefly halting visual flow for 1 s at  
711 random times. Closed loop sessions were followed by 4 sessions of an open loop condition, in which  
712 rotation of the spherical treadmill and movement in the virtual corridor were decoupled. The visual  
713 stimulus consisted of a replay of the visual flow recorded in the previous closed loop condition.  
714 Following this we recorded 2 sessions of what we refer to as a dark condition in which the virtual  
715 reality was switched off. Please note, this was not complete darkness, primarily because the  
716 shielding of the blue excitation light was not light proof. Finally, we recorded activity in 2 sessions of  
717 a grating condition in which we presented drifting grating stimuli (8 directions of  $6 \text{ s} \pm 2 \text{ s}$  (mean  $\pm$   
718 SD) duration each with an inter-grating interval of  $4.5 \text{ s} \pm 1.5 \text{ s}$  (mean  $\pm$  SD) gray screen, presented in  
719 randomized order). These sessions, totaling approximately 1 hour of recording time per day, were  
720 acquired for 3 consecutive days. For mice in which we went on to test the effect of drugs on dorsal  
721 cortex activity, the first post-drug injection data were acquired +1 h after drug injection (+30 mins in  
722 the case of amphetamine because of faster onset kinetics of the drug) and further data were  
723 collected at the +24 h and +48 h timepoints. Data in the manuscript are shown as the combined data  
724 over either all data collected before drug injection (labelled as naive) or after drug injection (labelled  
725 as clozapine, aripiprazole, haloperidol or amphetamine, respectively).

726 **Data acquisition.** All widefield imaging experiments were performed on a custom-built macroscope  
727 consisting of commercially available objectives mounted face-to-face (Nikon 85 mm/f1.8 sample  
728 side, Nikon 50 mm/f1.4 sensor side). We used a 470 nm LED (Thorlabs) powered by a custom-built  
729 LED driver for exciting GCaMP (or GFP) fluorescence through an excitation filter (SP490, Thorlabs)  
730 reflected off a dichroic mirror (LP490, Thorlabs) placed in the parfocal plane of the objectives. Green  
731 fluorescence was collected through a 525/50 emission filter on an sCMOS camera (PCO edge 4.2).  
732 Apertures on objectives were usually kept maximally open and the current at the LED driver was  
733 used to adjust fluorescence intensity to a value that was kept below 25% of the maximum dynamic



734 range of the sensor. In cases where this was not possible (e.g., transfection of GFP yielded extremely  
735 bright fluorescence, often visible with the naked eye), objective apertures were gradually reduced to  
736 avoid overexposure of the sensor. LED illumination was adjusted with a collimator (Thorlabs  
737 SM2F32-A) to achieve homogenous illumination across the surface of the cranial window. The  
738 resulting gaussian profile of the illumination cone was further trimmed with black tape on the  
739 sample side objective to avoid light shining directly into the mouse's eye. An Arduino board (Arduino  
740 Mega 2560) was used to control LED onsets synced to the frame trigger signal of the camera. The  
741 duty cycle of the 470 nm LED was 90%. Raw images were acquired at full speed (100 Hz; except for  
742 GFP controls, which were acquired at 50 Hz effective frame rate) and full dynamic range (16 bit) of  
743 the sensor. The raw images were cropped on-sensor and the resulting data was streamed to disk  
744 with custom written software in LabVIEW (National Instruments), resulting in an effective pixel size  
745 of  $6 \mu\text{m}^2$  at a standardized imaging resolution of 1108 pixels x 1220 pixels (1.35 MP).

746 **Data processing.** Off-line data processing and data analysis (section below) were done with custom-  
747 written MATLAB (2021a) scripts. Raw movie data was manually registered across days by aligning  
748 subsequent mean projections of the data to the first recorded image sequence. We placed regions  
749 of interest (ROIs) relative to readily identifiable anatomical landmarks that had been previously  
750 noted during cranial window surgery (see above). This resulted in the selection of six 20 pixels x 20  
751 pixels ROIs per hemisphere. Of those ROIs, we calculated the activity as the  $\Delta F/F_0$ , wherein  $F_0$  was  
752 the median fluorescence of the recording (approximately 30 000 frames in a 5 min recording).  $\Delta F/F_0$   
753 was corrected for slow fluorescence drift caused by thermal brightening of the LED using 8<sup>th</sup>  
754 percentile filtering with a 62.5 s moving window similar to what was described previously for two-  
755 photon imaging (Dombeck et al., 2007).

756 **Data analysis.** Locomotion and visual flow onsets were determined based on threshold crossing of  
757 locomotion or visual flow speed. To select only well isolated onsets, we used a speed threshold of 30  
758 cm/s and excluded all onsets with locomotion or visual flow in the 3 s window preceding the onset.  
759 To increase the number of locomotion onsets that passed the speed threshold criterion for the GFP  
760 imaging data (**Figure S1**), we excluded only those onsets if there was locomotion in the 1 s window  
761 preceding onset.

762 All stimulus response curves (**Figures 1F-1L, 3B and 3C, 3E and 3F, 4, 8, S1-S3**) were baseline  
763 subtracted. The baseline subtraction window for unpredictable stimuli (mismatch and grating) was -  
764 200 ms to 0 ms before stimulus onset. For closed loop and open loop locomotion onsets, and open  
765 loop visual flow onsets, to accommodate calcium indicator offset dynamics and potential

766 anticipatory activity, we placed the baseline subtraction windows for these onsets at -2900 ms to -  
767 2700 ms for GCaMP imaging, or -900 ms to -700 ms for GFP imaging. Varying this window within the  
768 bounds of offset dynamics of the indicator and anticipatory activity onset did not change the  
769 conclusions drawn in this manuscript. Analyses in which image sequences were aligned to event  
770 onsets (**Figures 1C-1D and 3**) used the same parameters as above.

771 On rare occasions, we observed seizure-like activity after antipsychotic drug injection. These events  
772 resulted in atypically high levels of correlation, and to avoid them from influencing our conclusions  
773 we excluded these data from further analysis. We excluded sessions if they contained an event in  
774 which average activity of all 12 ROIs remained elevated above 30%  $\Delta F/F$  for more than 10 s. This  
775 criterion led to the exclusion of 0.26% of data (10 out of 3801 of 5 min recording sessions).

776 To quantify the similarity of closed loop and open loop locomotion onset responses shown in **Figure**  
777 **1L** we calculated the correlation coefficient between the averaged responses (onsets and mice, 1 s  
778 moving average) in a window -5 s to +3 s, for each ROI.

779 To calculate the maps that show the timing of activation of individual dorsal cortex regions (**Figures**  
780 **3B and 3C, 3E and 3F**), we first aligned the craniotomies of all mice within one genotype to the first  
781 mouse's average grating response map and then calculated an average dorsal cortex response time  
782 course. For each pixel of this image sequence, we then determined the time at which the pixel's  
783 value crossed a threshold of the maximum value in the entire time course, divided by 6 standard  
784 deviations of the pixel's baseline value (-200 ms to 0 ms before event onset, as stated above). The  
785 resulting maps were denoised using a Gaussian filter and we removed all pixel clusters that  
786 contained fewer than 500 connected pixels. For illustration purposes, these maps were overlaid over  
787 an example crystal skull craniotomy to produce the panels shown in **Figure 3**.

788 For the correlation analyses shown in **Figures 5-7, S5 and S6**, we first calculated the correlation  
789 coefficient of neuronal activity for all possible pairs of the 12 regions of interest. We then  
790 determined the distance between each pair of ROIs and normalized this value by the distance  
791 between bregma and lambda obtained from the images during initial surgery for each mouse (**Figure**  
792 **S5A**). We plotted the correlation against the distance for each pair of regions of interest and binned  
793 the data in a 40 x 40 grid and smoothed the resulting image with a gaussian filter (**Figure S5B**), to  
794 obtain the heatmaps shown in **Figures 6A and 6B, 6D and 6E, 7A and 7B, 7D and 7E, 7G and 7H, S5B,**  
795 **S6C and S6D**. Contour lines in the heatmaps were then drawn to 50% of the maximum value in the  
796 plot. The boxplot quantifications (**Figures 6C, 6F, 7C, 7F, 7I, S6E**) were calculated as the change in  
797 correlation coefficient of activity after and before treatment for all pairs of regions of interest,

798 normalized to the value before treatment and split into short- and long-range using a threshold of  
799 0.9 of the bregma-lambda distance for each mouse.

800 For **Figure S2**, onset aligned data were first averaged for each mouse and then summed in the given  
801 combinations. The SEM was calculated over mice. For visualization purposes, we omitted the SEM  
802 from the open loop locomotion and open loop visual flow onset traces.

803 To obtain the differences in the correlation between activity and locomotion after and before  
804 clozapine injection (**Figure S4**), we first averaged all correlation coefficients in the individual sessions  
805 of a condition (closed loop, open loop, or dark) to generate one correlation coefficient per mouse  
806 and ROI, for each condition. We then calculated and plotted the difference between these  
807 correlation values after and before clozapine injection.

#### 808 **ACKNOWLEDGEMENTS**

809 We thank Tingjia Lu for production of the AAV vectors, Rebecca Jordan for performing the clear skull  
810 implants used in the hemodynamic response measurements, and members of the Keller lab for  
811 discussion and support. This project has received funding from the Swiss National Science  
812 Foundation, the Novartis Research Foundation, and the European Research Council (ERC) under the  
813 European Union's Horizon 2020 research and innovation programme (grant agreement No 865617).

#### 814 **AUTHOR CONTRIBUTIONS**

815 MH performed the experiments and analyzed the data. All authors wrote the manuscript.

#### 816 **CONFLICT OF INTEREST**

817 Part of the results presented herein have been included in patent application EP22153051.1.

818 **REFERENCES**

- 819 Allen, W.E., Kauvar, I.V., Chen, M.Z., Richman, E.B., Yang, S.J., Chan, K., Gradinaru, V., Deverman,  
820 B.E., Luo, L., and Deisseroth, K. (2017). Global Representations of Goal-Directed Behavior in Distinct  
821 Cell Types of Mouse Neocortex. *Neuron* *94*, 891-907.e6.
- 822 Anderson, C.T., Sheets, P.L., Kiritani, T., and Shepherd, G.M.G. (2010). Sublayer-specific microcircuits  
823 of corticospinal and corticostriatal neurons in motor cortex. *Nat Neurosci* *13*, 739–744.
- 824 Aravanis, A.M., Wang, L.-P., Zhang, F., Meltzer, L.A., Mogri, M.Z., Schneider, M.B., and Deisseroth, K.  
825 (2007). An optical neural interface: in vivo control of rodent motor cortex with integrated fiberoptic  
826 and optogenetic technology. *J Neural Eng* *4*, S143-156.
- 827 Attinger, A., Wang, B., and Keller, G.B. (2017). Visuomotor Coupling Shapes the Functional  
828 Development of Mouse Visual Cortex. *Cell* *169*, 1291-1302.e14.
- 829 Audette, N.J., Zhou, W., and Schneider, D.M. (2021). Temporally precise movement-based  
830 predictions in the mouse auditory cortex.
- 831 Ayaz, A., Stäubli, A., Hamada, M., Wulf, M.A., Saleem, A.B., and Helmchen, F. (2019). Layer-specific  
832 integration of locomotion and sensory information in mouse barrel cortex. *Nature Communications*  
833 *10*, 1–14.
- 834 Bastos, A.M., Usrey, W.M., Adams, R.A., Mangun, G.R., Fries, P., and Friston, K.J. (2012). Canonical  
835 microcircuits for predictive coding. *Neuron* *76*, 695–711.
- 836 Catafau, A.M., Parellada, E., Lomeña, F.J., Bernardo, M., Pavía, J., Ros, D., Setoain, J., and Gonzalez-  
837 Monclús, E. (1994). Prefrontal and temporal blood flow in schizophrenia: resting and activation  
838 technetium-99m-HMPAO SPECT patterns in young neuroleptic-naive patients with acute disease. *J*  
839 *Nucl Med* *35*, 935–941.
- 840 Chan, K.Y., Jang, M.J., Yoo, B.B., Greenbaum, A., Ravi, N., Wu, W.-L., Sánchez-Guardado, L., Lois, C.,  
841 Mazmanian, S.K., Deverman, B.E., et al. (2017). Engineered AAVs for efficient noninvasive gene  
842 delivery to the central and peripheral nervous systems. *Nat Neurosci* *20*, 1172–1179.
- 843 Constantinople, C.M., and Bruno, R.M. (2013). Deep cortical layers are activated directly by  
844 thalamus. *Science (New York, N.Y.)* *340*, 1591–1594.
- 845 Daigle, T.L., Madisen, L., Hage, T.A., Valley, M.T., Knoblich, U., Larsen, R.S., Takeno, M.M., Huang, L.,  
846 Gu, H., Larsen, R., et al. (2018). A Suite of Transgenic Driver and Reporter Mouse Lines with  
847 Enhanced Brain-Cell-Type Targeting and Functionality. *Cell* *174*, 465-480.e22.
- 848 Dierks, T., Linden, D.E., Jandl, M., Formisano, E., Goebel, R., Lanfermann, H., and Singer, W. (1999).  
849 Activation of Heschl's gyrus during auditory hallucinations. *Neuron* *22*, 615–621.
- 850 Dombeck, D.A., Khabbazi, A.N., Collman, F., Adelman, T.L., and Tank, D.W. (2007). Imaging large-scale  
851 neural activity with cellular resolution in awake, mobile mice. *Neuron* *56*, 43–57.
- 852 Douglas, R.J., and Martin, K.A. (1991). A functional microcircuit for cat visual cortex. *The Journal of*  
853 *Physiology* *440*, 735–769.

- 854 Eliades, S.J., and Wang, X. (2008). Neural substrates of vocalization feedback monitoring in primate  
855 auditory cortex. *Nature* 453, 1102–1106.
- 856 Fletcher, P.C., and Frith, C.D. (2009). Perceiving is believing: a Bayesian approach to explaining the  
857 positive symptoms of schizophrenia. *Nature Reviews. Neuroscience* 10, 48–58.
- 858 Franco, S.J., Gil-Sanz, C., Martinez-Garay, I., Espinosa, A., Harkins-Perry, S.R., Ramos, C., and Müller,  
859 U. (2012). Fate-Restricted Neural Progenitors in the Mammalian Cerebral Cortex. *Science*.
- 860 Frith, C. (2005). The neural basis of hallucinations and delusions. *Comptes Rendus Biologies* 328,  
861 169–175.
- 862 Garner, A.R., and Keller, G.B. (2022). A cortical circuit for audio-visual predictions. *Nat Neurosci* 25,  
863 98–105.
- 864 Gerfen, C.R., Paletzki, R., and Heintz, N. (2013). GENSAT BAC Cre-Recombinase Driver Lines to Study  
865 the Functional Organization of Cerebral Cortical and Basal Ganglia Circuits. *Neuron* 80, 1368–1383.
- 866 Gong, S., Doughty, M., Harbaugh, C.R., Cummins, A., Hatten, M.E., Heintz, N., and Gerfen, C.R.  
867 (2007). Targeting Cre Recombinase to Specific Neuron Populations with Bacterial Artificial  
868 Chromosome Constructs. *J. Neurosci.* 27, 9817–9823.
- 869 Gorski, J.A., Talley, T., Qiu, M., Puellas, L., Rubenstein, J.L.R., and Jones, K.R. (2002). Cortical  
870 excitatory neurons and glia, but not GABAergic neurons, are produced in the Emx1-expressing  
871 lineage. *J Neurosci* 22, 6309–6314.
- 872 Guo, Z.V., Li, N., Huber, D., Ophir, E., Gutnisky, D., Ting, J.T., Feng, G., and Svoboda, K. (2014). Flow of  
873 cortical activity underlying a tactile decision in mice. *Neuron* 81, 179–194.
- 874 Haarsma, J., Kok, P., and Browning, M. (2020). The promise of layer-specific neuroimaging for testing  
875 predictive coding theories of psychosis. *Schizophrenia Research*.
- 876 Harrison, P.J., and Weinberger, D.R. (2005). Schizophrenia genes, gene expression, and  
877 neuropathology: on the matter of their convergence. *Mol Psychiatry* 10, 40–68.
- 878 Heindorf, M., Arber, S., and Keller, G.B. (2018). Mouse Motor Cortex Coordinates the Behavioral  
879 Response to Unpredicted Sensory Feedback. *Neuron* 99, 1040-1054.e5.
- 880 Hippenmeyer, S., Vrieseling, E., Sigrist, M., Portmann, T., Laengle, C., Ladle, D.R., and Arber, S.  
881 (2005). A Developmental Switch in the Response of DRG Neurons to ETS Transcription Factor  
882 Signaling. *PLOS Biology* 3, e159.
- 883 Javitt, D.C. (2009). Sensory Processing in Schizophrenia: Neither Simple nor Intact. *Schizophr Bull* 35,  
884 1059–1064.
- 885 Jiang, L.P., and Rao, R.P.N. (2021). Predictive Coding Theories of Cortical Function. *ArXiv:2112.10048*  
886 [q-Bio].
- 887 Jordan, M.I., and Rumelhart, D.E. (1992). Forward Models: Supervised Learning with a Distal  
888 Teacher. *Cognitive Science* 16, 307–354.

- 889 Jordan, R., and Keller, G.B. (2020). Opposing Influence of Top-down and Bottom-up Input on  
890 Excitatory Layer 2/3 Neurons in Mouse Primary Visual Cortex. *Neuron* 108, 1194-1206.e5.
- 891 Keller, G.B., and Hahnloser, R.H.R. (2009). Neural processing of auditory feedback during vocal  
892 practice in a songbird. *Nature* 457, 187–190.
- 893 Keller, G.B., and Mrsic-Flogel, T.D. (2018). Predictive Processing: A Canonical Cortical Computation.  
894 *Neuron* 100, 424–435.
- 895 Keller, G.B., Bonhoeffer, T., and Hübener, M. (2012). Sensorimotor mismatch signals in primary  
896 visual cortex of the behaving mouse. *Neuron* 74, 809–815.
- 897 Kim, T.H., Zhang, Y., Lecoq, J., Jung, J.C., Li, J., Zeng, H., Niell, C.M., and Schnitzer, M.J. (2016). Long-  
898 Term Optical Access to an Estimated One Million Neurons in the Live Mouse Cortex. *Cell Rep* 17,  
899 3385–3394.
- 900 Kiritani, T., Wickersham, I.R., Seung, H.S., and Shepherd, G.M.G. (2012). Hierarchical connectivity and  
901 connection-specific dynamics in the corticospinal-corticostriatal microcircuit in mouse motor cortex.  
902 *J Neurosci* 32, 4992–5001.
- 903 Le Bihan, D., Turner, R., Zeffiro, T.A., Cuénod, C.A., Jezzard, P., and Bonnerot, V. (1993). Activation of  
904 human primary visual cortex during visual recall: a magnetic resonance imaging study. *Proceedings*  
905 *of the National Academy of Sciences of the United States of America* 90, 11802–11805.
- 906 Leinweber, M., Zmarz, P., Buchmann, P., Argast, P., Hübener, M., Bonhoeffer, T., and Keller, G.B.  
907 (2014). Two-photon calcium imaging in mice navigating a virtual reality environment. *Journal of*  
908 *Visualized Experiments : JoVE* e50885.
- 909 Leinweber, M., Ward, D.R., Sobczak, J.M., Attinger, A., and Keller, G.B. (2017). A Sensorimotor Circuit  
910 in Mouse Cortex for Visual Flow Predictions. *Neuron* 95, 1420-1432.e5.
- 911 Li, S., Hu, N., Zhang, W., Tao, B., Dai, J., Gong, Y., Tan, Y., Cai, D., and Lui, S. (2019). Dysconnectivity of  
912 Multiple Brain Networks in Schizophrenia: A Meta-Analysis of Resting-State Functional Connectivity.  
913 *Front. Psychiatry* 0.
- 914 Li, T., Wang, Q., Zhang, J., Rolls, E.T., Yang, W., Palaniyappan, L., Zhang, L., Cheng, W., Yao, Y., Liu, Z.,  
915 et al. (2017). Brain-Wide Analysis of Functional Connectivity in First-Episode and Chronic Stages of  
916 Schizophrenia. *Schizophr Bull* 43, 436–448.
- 917 Ma, Y., Shaik, M.A., Kim, S.H., Kozberg, M.G., Thibodeaux, D.N., Zhao, H.T., Yu, H., and Hillman,  
918 E.M.C. (2016). Wide-field optical mapping of neural activity and brain haemodynamics:  
919 considerations and novel approaches. *Philosophical Transactions of the Royal Society B: Biological*  
920 *Sciences* 371, 20150360.
- 921 Madisen, L., Zwingman, T.A., Sunkin, S.M., Oh, S.W., Zariwala, H.A., Gu, H., Ng, L.L., Palmiter, R.D.,  
922 Hawrylycz, M.J., Jones, A.R., et al. (2010). A robust and high-throughput Cre reporting and  
923 characterization system for the whole mouse brain. *Nature Neuroscience* 13, 133–140.
- 924 Maia, T.V., and Frank, M.J. (2017). An Integrative Perspective on the Role of Dopamine in  
925 Schizophrenia. *Biol Psychiatry* 81, 52–66.



- 926 Moghaddam, B., and Javitt, D. (2012). From Revolution to Evolution: The Glutamate Hypothesis of  
927 Schizophrenia and its Implication for Treatment. *Neuropsychopharmacol* 37, 4–15.
- 928 Morita, K., Im, S., and Kawaguchi, Y. (2019). Differential Striatal Axonal Arborizations of the  
929 Intratelencephalic and Pyramidal-Tract Neurons: Analysis of the Data in the MouseLight Database.  
930 *Frontiers in Neural Circuits* 13.
- 931 Musall, S., Kaufman, M.T., Juavinett, A.L., Gluf, S., and Churchland, A.K. (2019). Single-trial neural  
932 dynamics are dominated by richly varied movements. *Nat Neurosci* 22, 1677–1686.
- 933 Northoff, G., and Duncan, N.W. (2016). How do abnormalities in the brain’s spontaneous activity  
934 translate into symptoms in schizophrenia? From an overview of resting state activity findings to a  
935 proposed spatiotemporal psychopathology. *Prog Neurobiol* 145–146, 26–45.
- 936 Oberlaender, M., Ramirez, A., and Bruno, R.M. (2012). Sensory Experience Restructures  
937 Thalamocortical Axons during Adulthood. *Neuron* 74, 648–655.
- 938 Pakan, J.M., Lowe, S.C., Dylida, E., Keemink, S.W., Currie, S.P., Coutts, C.A., and Rochefort, N.L.  
939 (2016). Behavioral-state modulation of inhibition is context-dependent and cell type specific in  
940 mouse visual cortex. *ELife* 5.
- 941 Parellada, M., Gomez-Vallejo, S., Burdeus, M., and Arango, C. (2017). Developmental Differences  
942 Between Schizophrenia and Bipolar Disorder. *Schizophr Bull* 43, 1176–1189.
- 943 Rao, R.P.N., and Ballard, D.H. (1999). Predictive coding in the visual cortex: a functional  
944 interpretation of some extra-classical receptive-field effects. *Nature Neuroscience* 2, 79–87.
- 945 Saleem, A.B., Ayaz, A., Jeffery, K.J., Harris, K.D., and Carandini, M. (2013). Integration of visual  
946 motion and locomotion in mouse visual cortex. *Nature Neuroscience* 16, 1864–1869.
- 947 Schmack, K., Bosc, M., Ott, T., Sturgill, J.F., and Kepecs, A. (2021). Striatal dopamine mediates  
948 hallucination-like perception in mice. *Science* 372, eabf4740.
- 949 Shergill, S.S., Brammer, M.J., Williams, S.C., Murray, R.M., and McGuire, P.K. (2000). Mapping  
950 auditory hallucinations in schizophrenia using functional magnetic resonance imaging. *Arch Gen*  
951 *Psychiatry* 57, 1033–1038.
- 952 Singh, T., Neale, B.M., Daly, M.J., and Consortium, on behalf of the S.E.M.-A. (SCHEMA) (2020).  
953 Exome sequencing identifies rare coding variants in 10 genes which confer substantial risk for  
954 schizophrenia.
- 955 Stanley, J., and Miall, R.C. (2007). Functional activation in parieto-premotor and visual areas  
956 dependent on congruency between hand movement and visual stimuli during motor-visual priming.  
957 *NeuroImage* 34, 290–299.
- 958 Stringer, C., Pachitariu, M., Steinmetz, N., Reddy, C.B., Carandini, M., and Harris, K.D. (2019).  
959 Spontaneous behaviors drive multidimensional, brainwide activity. *Science* 364, 255.
- 960 Suzuki, M., and Larkum, M.E. (2020). General Anesthesia Decouples Cortical Pyramidal Neurons. *Cell*  
961 180, 666–676.e13.

- 962 Taniguchi, H., He, M., Wu, P., Kim, S., Paik, R., Sugino, K., Kvitsani, D., Fu, Y., Lu, J., Lin, Y., et al.  
963 (2011). A Resource of Cre Driver Lines for Genetic Targeting of GABAergic Neurons in Cerebral  
964 Cortex. *Neuron* 71, 995–1013.
- 965 Valley, M.T., Moore, M.G., Zhuang, J., Mesa, N., Castelli, D., Sullivan, D., Reimers, M., and Waters, J.  
966 (2020). Separation of hemodynamic signals from GCaMP fluorescence measured with wide-field  
967 imaging. *J Neurophysiol* 123, 356–366.
- 968 Wekselblatt, J.B., Flister, E.D., Piscopo, D.M., and Niell, C.M. (2016). Large-scale imaging of cortical  
969 dynamics during sensory perception and behavior. *Journal of Neurophysiology* 115, 2852–2866.
- 970 Widmer, F.C., and Keller, G.B. (2021). Developmental plasticity in visual cortex is necessary for  
971 normal visuomotor integration and visuomotor skill learning. *BioRxiv* 2021.06.20.449148.
- 972 Xu, X., Olivas, N.D., Ikrar, T., Peng, T., Holmes, T.C., Nie, Q., and Shi, Y. (2016). Primary visual cortex  
973 shows laminar-specific and balanced circuit organization of excitatory and inhibitory synaptic  
974 connectivity. *The Journal of Physiology* 594, 1891–1910.
- 975 Yamawaki, N., and Shepherd, G.M.G. (2015). Synaptic circuit organization of motor corticothalamic  
976 neurons. *J Neurosci* 35, 2293–2307.
- 977 Yoon, J.H., Rokem, A.S., Silver, M.A., Minzenberg, M.J., Ursu, S., Ragland, J.D., and Carter, C.S. (2009).  
978 Diminished orientation-specific surround suppression of visual processing in schizophrenia.  
979 *Schizophr Bull* 35, 1078–1084.
- 980 Zmarz, P., and Keller, G.B. (2016). Mismatch Receptive Fields in Mouse Visual Cortex. *Neuron* 92,  
981 766–772.
- 982
